# Supplementary material for: Three-step synthesis ofl-ido-1-deoxynojirimycin derivatives by reductive amination in water, “borrowing hydrogen” under neat conditions and deprotection
Source: Royal Society of Chemistry journal article supplement (doi:10.1039/c6ob01864e), 2016-01-01

## Supporting information

# Green synthesis of 1-deoxynojirimycin derivatives by reductive amination in water and “borrowing hydrogen” without solvent

Kai Zhao, Gang Zhou, Huifang Nie and Weiping Chen \*

## I. Experimental Details:

### General:

All the air or moisture sensitive reactions and manipulations were performed under an inert atmosphere in oven-dried glassware. The  $^1\text{H}$  and  $^{13}\text{C}$  NMR spectra were recorded on a Bruker AV-400 spectrometer using TMS as an internal reference. Coupling constant ( $J$ ) values are given in Hz. Optical rotation analyses were performed on a Perkin-Elmer Model 343 Polarimeter. HRMS were recorded on a ZAB-HS spectrometer with ES ionization (ESI). All commercially available reagents were used as received. Complexed **17e**,<sup>1</sup>  $[\text{IrCp}^*\text{I}_2]_2$ ,<sup>2</sup> and  $[\text{Cp}^*\text{Ir}(\text{NH}_3)_3]\text{I}_2$ <sup>3</sup> were prepared according to literature's procedure.

### 1. General procedure for Reductive Amination:

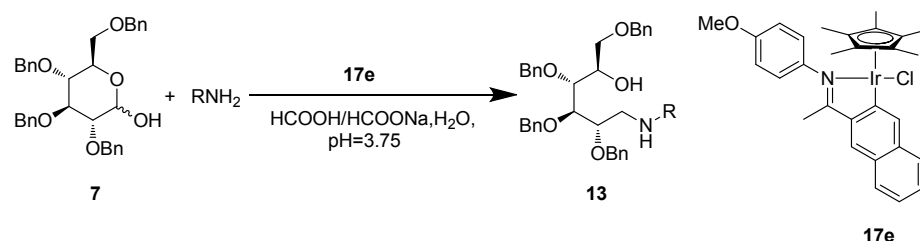

Compound **7** (10 mmol) and complexe **17e** (13.0mg, 0.2% mmol) were charged under argon-atomsphere in a three necked bottle with reflux device. Amine (20 mmol) was then introduced with vigorous stirring for 15 min. To the mixture was added  $\text{HCOOH}-\text{HCOONa}$  buffer ( $\text{pH} = 3.60$ ), prepared from  $\text{HCOOH}$  (88%, 14 mL),  $\text{HCOONa} \cdot 2\text{H}_2\text{O}$  (24.5 g) and water (26 mL). The resulting mixture was bubbled with argon for 15 min at room temperature, and was heated at  $90^\circ\text{C}$  for 24 h with stirring. The reaction mixture was allowed to cool to room temperature and diluted with ethyl acetate. The organic layer was washed with water and saturated brine solution, dried over anhydrous  $\text{Na}_2\text{SO}_4$ . The solvent was removed under vacuum and the product was purified by  $\text{SiO}_2$  column chromatography (Eluent: Hexane: EtOAc=2:1~1:1).

### (2*R*,3*R*,4*R*,5*S*)-6-(benzylamino)-1,3,4,5-tetrakis(benzyloxy)hexan-2-ol (**13a**)

Colorless oil. Yield: 68.0%.  $^1\text{H}$  NMR (400 MHz,  $\text{CDCl}_3$ ):  $\delta = 7.45 - 7.20$  (m, 25H), 4.78 – 4.48 (m, 8H), 4.08 (dd,  $J = 10.3, 5.3$  Hz, 1H), 3.97 (dd,  $J = 6.4, 3.6$  Hz, 1H), 3.92 (dd,  $J = 10.3, 5.9$  Hz, 1H), 3.74 (dd,  $J = 6.6, 3.5$  Hz, 1H), 3.72 – 3.59 (m, 4H), 2.84 (dd,  $J = 12.5, 4.1$  Hz, 1H), 2.67 (dd,  $J = 12.5, 5.8$  Hz, 1H).  $^{13}\text{C}$  NMR (101 MHz,  $\text{CDCl}_3$ ):  $\delta = 140.32, 138.50, 138.27, 138.22, 138.14, 128.44, 128.38, 128.34, 128.13, 127.97, 127.92, 127.83, 127.77, 127.75, 127.69, 127.68, 126.90, 79.46, 79.38, 77.71, 74.54, 73.46, 73.16, 73.12, 71.38, 70.78, 53.85, 49.04$ .  $[\alpha]_D^{20} = +11.0^\circ$  ( $c = 1, \text{CHCl}_3$ ). HRMS (ESI+)  $m/z$  calculated for  $\text{C}_{41}\text{H}_{45}\text{NO}_5$   $[\text{M}+\text{H}]^+$ : 632.3371, found: 632.3384.

### (2*R*,3*R*,4*R*,5*S*)-1,3,4,5-tetrakis(benzyloxy)-6-((4-methoxybenzyl)amino)hexan-2-ol (**13a'**)

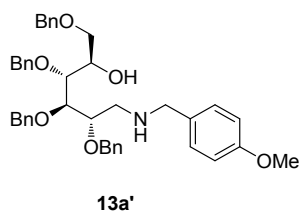

Light yellow oil. Yield: 69.7%. <sup>1</sup>H NMR (400 MHz, CDCl<sub>3</sub>): δ = 7.45 – 7.27 (m, 20H), 7.23 (d, J = 8.5 Hz, 2H), 6.91 (dd, J = 8.5 Hz, 2H), 4.84 (d, J = 11.3 Hz, 1H), 4.76 (dd, J = 11.4, 5.6 Hz, 2H), 4.67 (dd, J = 11.4, 7.8 Hz, 2H), 4.63 – 4.54 (m, 3H), 4.15 (dd, J = 10.1, 5.5 Hz, 1H), 4.04 (dd, J = 6.3, 3.6 Hz, 1H), 3.98 (dd, J = 10.3, 5.8 Hz, 1H), 3.84 (d, J = 3.9 Hz, 3H), 3.84 – 3.79 (m, 1H), 3.78 – 3.71 (m, 2H), 3.69 (d, J = 9.8 Hz, 2H), 2.90 (dd, J = 12.5, 4.0 Hz, 1H), 2.73 (dd, J = 12.5, 5.8 Hz, 1H). <sup>13</sup>C NMR (101 MHz, CDCl<sub>3</sub>): δ = 158.67, 138.61, 138.39, 138.35, 138.24, 132.54, 129.37, 128.49, 128.44, 128.40, 128.15, 128.02, 127.96, 127.80, 127.74, 127.73, 113.79, 79.59, 79.50, 77.88, 74.62, 73.50, 73.23, 73.14, 71.51, 70.87, 55.32, 53.32, 48.99. [α]<sub>D</sub><sup>20</sup> = +9.6° (c = 1, CHCl<sub>3</sub>). HRMS (ESI+) m/z calculated for C<sub>42</sub>H<sub>47</sub>NO<sub>6</sub> [M+H]<sup>+</sup>: 662.3476, found: 662.3481.

**(2R,3R,4R,5S)-1,3,4,5-tetrakis(benzyloxy)-6-((2-(benzyloxy)ethyl)amino)hexan-2-ol (13b)**

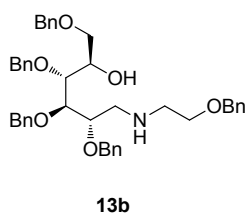

Light yellow oil. Yield: 67.2%. <sup>1</sup>H NMR (400 MHz, CDCl<sub>3</sub>): δ = 7.51 – 7.23 (m, 25H), 4.87 – 4.50 (m, 10H), 4.21 – 3.79 (m, 4H), 3.72 (d, J = 4.3 Hz, 2H), 3.58 (t, J = 5.0 Hz, 2H), 3.16 (s, 2H), 2.93 – 2.69 (m, 4H). <sup>13</sup>C NMR (101 MHz, CDCl<sub>3</sub>): δ = 138.49, 138.41, 138.32, 138.29, 138.23, 128.46, 128.43, 128.39, 128.13, 128.05, 127.92, 127.81, 127.76, 127.72, 127.65, 79.46, 79.01, 77.90, 74.49, 73.47, 73.37, 73.33, 73.18, 71.45, 70.90, 69.45, 49.83, 49.30. [α]<sub>D</sub><sup>20</sup> = +15.6° (c = 1, CHCl<sub>3</sub>).

HRMS (ESI+) m/z calculated for C<sub>43</sub>H<sub>49</sub>NO<sub>6</sub> [M+H]<sup>+</sup>: 676.3633, found: 676.3629.

**(2R,3R,4R,5S)-1,3,4,5-tetrakis(benzyloxy)-6-(butylamino)hexan-2-ol (13c)**

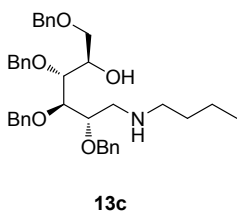

Colorless oil. Yield: 61.7%. <sup>1</sup>H NMR (400 MHz, CDCl<sub>3</sub>): δ = 7.63 – 7.03 (m, 20H), 4.90 – 4.52 (m, 8H), 4.26 – 3.67 (m, 6H), 2.94 – 2.83 (m, 1H), 2.79 – 2.77 (m, 1H), 2.52 (t, J = 7.0 Hz, 2H), 1.51 – 1.39 (m, 2H), 1.38 – 1.28 (m, 2H), 0.97 (t, J = 7.2 Hz, 3H). <sup>13</sup>C NMR (101 MHz, CDCl<sub>3</sub>): δ = 138.60, 138.37, 138.26, 128.50, 128.47, 128.44, 128.41, 128.15, 128.08, 127.93, 127.83, 127.77, 127.73, 79.58, 79.22, 77.96, 74.53, 73.48, 73.37, 73.33, 71.52, 70.97, 50.07, 49.77, 32.22, 20.53, 14.15. [α]<sub>D</sub><sup>20</sup> = +16.1° (c = 1, CHCl<sub>3</sub>).

HRMS (ESI+) m/z calculated for C<sub>38</sub>H<sub>47</sub>NO<sub>5</sub> [M+H]<sup>+</sup>: 598.3527, found: 598.3532.

**(2R,3R,4R,5S)-1,3,4,5-tetrakis(benzyloxy)-6-(hexylamino)hexan-2-ol (13d)**

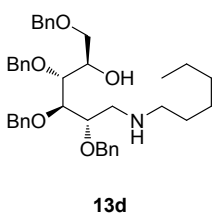

Light yellow oil. Yield: 62.3%. <sup>1</sup>H NMR (400 MHz, CDCl<sub>3</sub>): δ = 7.40 – 7.33 (m, 20H), 4.96 – 4.43 (m, 8H), 4.19 – 3.63 (m, 6H), 2.96 – 2.79 (m, 1H), 2.79 – 2.65 (m, 1H), 2.49 (t, J = 7.2 Hz, 2H), 1.54 – 1.22 (m, 8H), 0.96 (t, J = 6.9 Hz, 3H). <sup>13</sup>C NMR (101 MHz, CDCl<sub>3</sub>): δ = 138.55, 138.30, 138.22, 128.48, 128.46, 128.45, 128.42, 128.38, 128.12, 128.06, 127.90, 127.81, 127.76, 127.74, 127.71, 79.52, 79.12, 77.88, 74.47, 73.47, 73.35, 73.32, 71.45, 70.93, 50.06, 31.84, 30.01, 27.06, 22.71, 14.17.

[α]<sub>D</sub><sup>20</sup> = +14.7° (c = 1, CHCl<sub>3</sub>). HRMS (ESI+) m/z calculated for C<sub>40</sub>H<sub>51</sub>NO<sub>5</sub> [M+H]<sup>+</sup>: 626.3840, found: 626.3844.

**(2R,3R,4R,5S)-1,3,4,5-tetrakis(benzyloxy)-6-(octylamino)hexan-2-ol (13e)**

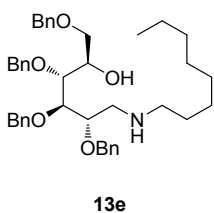

Light yellow oil. Yield: 63.7%. <sup>1</sup>H NMR (400 MHz, CDCl<sub>3</sub>): δ = 7.41 – 7.32 (m, 20H), 4.93 – 4.51 (m, 8H), 4.21 – 3.61 (m, 6H), 2.89 – 2.85 (m, 1H), 2.80 – 2.65 (m, 1H), 2.50 (t, J = 6.9 Hz, 2H), 1.55 – 1.21 (m, 12H), 0.98 (t, J = 5.8 Hz, 3H). <sup>13</sup>C NMR (101 MHz, CDCl<sub>3</sub>): δ = 138.58, 138.34, 138.24, 128.48, 128.46, 128.43, 128.39, 128.13, 128.06, 127.91, 127.81, 127.75, 127.71, 79.56, 79.20, 77.93, 74.50, 73.47, 73.37, 73.32, 71.49, 70.95, 50.10, 31.94, 30.11, 29.62, 29.39, 27.42, 22.77, 14.23.

[α]<sub>D</sub><sup>20</sup> = +14.1° (c = 1, CHCl<sub>3</sub>). HRMS (ESI+) m/z calculated for C<sub>42</sub>H<sub>55</sub>NO<sub>5</sub> [M+H]<sup>+</sup>: 654.4153, found: 654.4167.

## 2. General procedure for intramolecular alkylation

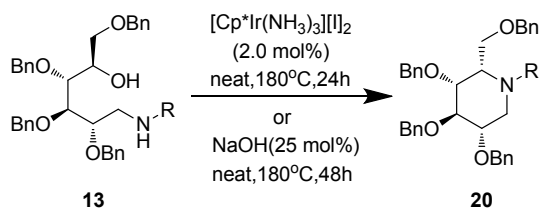

**Method A:** Amino alcohol **13** (5.0 mmol) and  $[\text{Cp}^*\text{Ir}(\text{NH}_3)_3][\text{I}]_2$  (63.2mg, 2.0 mol%) were charged under argon-atmosphere in a Schlenk flask. The reaction flask was heated to the 180°C under stirring for 24h, then the reaction mixture was allowed to cool to room temperature and diluted with EtOAc. The organic layer was washed with water and saturated brine solution, dried over  $\text{Na}_2\text{SO}_4$ . The solvent was removed under vacuum and the product was purified by  $\text{SiO}_2$  column chromatography (Eluent: Hexane: EtOAc=9:1~4:1).

**Method B:** Amino alcohol **13** (4.0 mmol) and solid NaOH (40 mg, 25 mol%) were added to a glass flask. Then, the reaction mixture was heated to 180°C and vigorously stirred for 48h under  $\text{Ar}_2$  atmosphere. The reaction mixture was allowed to cool to room temperature and diluted with EtOAc. The organic layer was washed with water and saturated brine solution, dried over  $\text{Na}_2\text{SO}_4$ . The solvent was removed under vacuum and the product was purified by  $\text{SiO}_2$  column chromatography (Eluent: Hexane: EtOAc=9:1~4:1).

### N-benzyl-2,3,4,6-Tetra-O-benzyl-L-ido-1-deoxynojirimycin (**20a**)

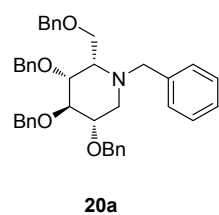

Colorless oil. Yield: 39.5% (Method A), 12.4% (Method B).  $^1\text{H}$  NMR (400 MHz,  $\text{CDCl}_3$ ):  $\delta$  = 7.42 – 7.17 (m, 25H), 4.87 (q, 2H), 4.76 – 4.48 (m, 6H), 4.13 – 3.88 (m, 2H), 3.87 – 3.68 (m, 3H), 3.59 (m, 2H), 3.46 (t,  $J$  = 5.7 Hz, 1H), 2.88 (dd,  $J$  = 11.8, 4.1 Hz, 1H), 2.63 (t,  $J$  = 10.5 Hz, 1H).  $^{13}\text{C}$  NMR (101 MHz,  $\text{CDCl}_3$ ):  $\delta$  = 139.68, 139.18, 138.57, 128.36, 128.33, 128.31, 128.26, 128.22, 127.94, 127.75, 127.54, 127.50, 127.40, 126.86, 83.12, 80.37, 79.03, 77.23, 75.45, 73.31, 72.85, 72.61, 64.74, 59.86, 59.08, 48.78, 29.72.  $[\alpha]_{\text{D}}^{20}$  =  $-4.4^\circ$  ( $c$  = 1,  $\text{CHCl}_3$ ). HRMS (ESI+)  $m/z$  calculated for  $\text{C}_{41}\text{H}_{43}\text{NO}_4$   $[\text{M}+\text{H}]^+$ : 614.3265, found: 614.3268.

### N-(4-methoxybenzyl)-2,3,4,6-Tetra-O-benzyl-L-ido-1-deoxynojirimycin (**20a'**)

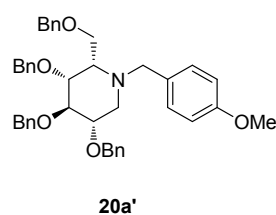

Colorless oil. Yield: 38.7% (Method A), 9.6% (Method B).  $^1\text{H}$  NMR (400 MHz,  $\text{CDCl}_3$ ):  $\delta$  = 7.48 – 7.30 (m, 20H), 7.24 (d,  $J$  = 8.3 Hz, 2H), 6.89 (d,  $J$  = 8.3 Hz, 2H), 4.90 (q,  $J$  = 10.9 Hz, 2H), 4.80 – 4.53 (m, 6H), 4.08 – 3.66 (m, 9H), 3.62 (d,  $J$  = 5.3 Hz, 2H), 2.91 (dd,  $J$  = 11.7, 3.9 Hz, 1H), 2.65 (t,  $J$  = 13.1, 7.8 Hz, 1H).  $^{13}\text{C}$  NMR (101 MHz,  $\text{CDCl}_3$ ):  $\delta$  = 158.63, 139.24, 138.64, 138.61, 132.03, 131.68, 129.47, 128.39, 128.36, 128.34, 128.30, 127.98, 127.78, 127.58, 127.55, 127.53, 127.43, 114.37, 113.67, 83.22, 80.40, 79.09, 75.46, 73.33, 72.88, 72.62, 64.77, 59.62, 58.46, 55.61, 55.29, 48.77.  $[\alpha]_{\text{D}}^{20}$  =  $-1.8^\circ$  ( $c$  = 1,  $\text{CHCl}_3$ ). HRMS (ESI+)  $m/z$  calculated for  $\text{C}_{42}\text{H}_{45}\text{NO}_5$   $[\text{M}+\text{H}]^+$ : 644.3371, found: 644.3370.

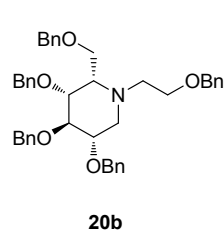

**N-(2-(benzyloxy)ethyl)-2,3,4,6-Tetra-O-benzyl-L-ido-1-deoxynojirimycin (**20b**)**  
 Colorless oil. Yield: 31.9% (Method A), 9.1% (Method B).  $^1\text{H}$  NMR (400 MHz,  $\text{CDCl}_3$ ):  $\delta$  = 7.54 – 7.31 (m, 25H), 5.06 – 4.50 (m, 10H), 4.03 – 3.44 (m, 8H), 3.26 – 3.05 (m, 2H), 3.05 – 2.89 (m, 1H), 2.83 – 2.64 (m, 1H).  $^{13}\text{C}$  NMR (101 MHz,  $\text{CDCl}_3$ ):  $\delta$  = 139.28, 138.79, 138.72, 138.62, 128.64, 128.55, 128.48, 128.42, 128.37, 128.06, 127.87, 127.75, 127.70, 127.64, 127.59, 127.52, 83.00, 80.26, 78.94, 75.46, 73.38, 73.19, 73.04, 72.78, 69.06, 64.73, 60.47, 54.64, 50.26.  $[\alpha]_{\text{D}}^{20}$  =  $-16.4^\circ$  ( $c$  = 1,  $\text{CHCl}_3$ ). HRMS (ESI+)  $m/z$

calculated for C<sub>43</sub>H<sub>47</sub>NO<sub>5</sub> [M+H]<sup>+</sup>: 658.3527, found: 658.3525.

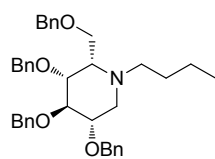

**20c**

#### N-butyl-2,3,4,6-Tetra-O-benzyl-L-ido-1-deoxynojirimycin (20c)

Colorless oil. Yield: 42.3% (Method A), 11.9% (Method B). <sup>1</sup>H NMR (400 MHz, CDCl<sub>3</sub>): δ = 7.57 - 7.12 (m, 20H), 4.85 (dd, J = 24.1, 11.0 Hz, 2H), 4.76 - 4.62 (m, 4H), 4.59 - 4.48 (m, 2H), 3.84 (dd, J = 10.1, 6.4 Hz, 1H), 3.78 - 3.65 (m, 2H), 3.64 - 3.44 (m, 2H), 3.39 (t, J = 4.9 Hz, 1H), 2.90 (dd, J = 11.9, 5.4 Hz, 1H), 2.73 (ddd, J = 12.5, 8.8, 6.2 Hz, 1H), 2.54 (t, 2H), 1.54 - 1.37 (m, 2H), 1.37 - 1.19 (m, 2H), 0.91 (t, J = 7.3 Hz, 3H). <sup>13</sup>C NMR (101 MHz, CDCl<sub>3</sub>): δ = 139.26, 138.78, 138.72, 138.66, 128.41, 128.35, 128.30, 128.00, 127.83, 127.63, 127.55, 127.49, 127.47, 127.43, 83.20, 80.38, 78.99, 75.39, 73.29, 73.06, 72.71, 64.50, 59.84, 54.53, 49.93, 30.25, 20.49, 14.10. α<sub>D</sub><sup>20</sup> = -14.4° (c = 1, CHCl<sub>3</sub>). HRMS (ESI<sup>+</sup>) m/z calculated for C<sub>38</sub>H<sub>45</sub>NO<sub>4</sub> [M+H]<sup>+</sup>: 580.3422, found: 580.3426.

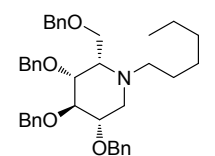

**20d**

#### N-hexyl-2,3,4,6-Tetra-O-benzyl-L-ido-1-deoxynojirimycin (20d)

Colorless oil. Yield: 41.8% (Method A), 10.7% (Method B). <sup>1</sup>H NMR (400 MHz, CDCl<sub>3</sub>): δ = 7.37 - 7.20 (m, 20H), 4.92 - 4.46 (m, 8H), 3.88 - 3.80 (m, 1H), 3.77 - 3.65 (m, 2H), 3.63 - 3.46 (m, 2H), 3.43 - 3.36 (m, 1H), 2.90 (dd, J = 7.2 Hz, 1H), 2.77 - 2.67 (m, 1H), 2.55 (t, J = 10.4 Hz, 2H), 1.57 - 1.48 (m, 2H), 1.37 - 1.32 (m, 6H), 0.96 (t, J = 6.8 Hz, 3H). <sup>13</sup>C NMR (101 MHz, CDCl<sub>3</sub>): δ = 139.26, 138.79, 138.72, 138.66, 128.46, 128.41, 128.35, 128.29, 128.00, 127.83, 127.63, 127.55, 127.49, 127.47, 127.43, 83.19, 80.36, 78.97, 75.39, 73.30, 73.05, 72.72, 64.50, 59.79, 54.83, 49.95, 31.81, 28.01, 26.99, 22.73, 14.16. [α]<sub>D</sub><sup>20</sup> = -17.1° (c = 1, CHCl<sub>3</sub>). HRMS (ESI<sup>+</sup>) m/z calculated for C<sub>40</sub>H<sub>49</sub>NO<sub>4</sub> [M+H]<sup>+</sup>: 608.3735, found: 608.3738.

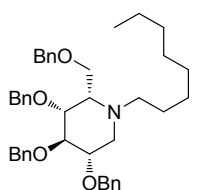

**20e**

#### N-octyl-2,3,4,6-Tetra-O-benzyl-L-ido-1-deoxynojirimycin (20e)

Colorless oil. Yield: 40.6% (Method A), 11.5% (Method B). <sup>1</sup>H NMR (400 MHz, CDCl<sub>3</sub>): δ = 7.39 - 7.26 (m, 20H), 4.94 - 4.46 (m, 8H), 3.84 (dd, J = 10.1, 6.4 Hz, 1H), 3.77 - 3.65 (m, 2H), 3.55 (ddd, J = 22.0, 16.1, 8.9 Hz, 2H), 3.39 (t, J = 4.6 Hz, 1H), 2.90 (dd, J = 11.8, 5.4 Hz, 1H), 2.78 - 2.48 (m, 3H), 1.48 - 1.17 (m, 12H), 0.93 (t, J = 6.7 Hz, 3H). <sup>13</sup>C NMR (101 MHz, CDCl<sub>3</sub>): δ = 139.22, 138.75, 138.69, 138.63, 128.49, 128.43, 128.38, 128.35, 128.32, 128.26, 127.97, 127.80, 127.60, 127.52, 127.46, 83.16, 80.33, 78.94, 75.36, 73.27, 73.04, 72.70, 64.47, 59.76, 54.80, 49.92, 31.90, 29.53, 29.36, 29.29, 27.31, 22.71, 14.16. [α]<sub>D</sub><sup>20</sup> = -26.3° (c = 1, CHCl<sub>3</sub>). HRMS (ESI<sup>+</sup>) m/z calculated for C<sub>42</sub>H<sub>53</sub>NO<sub>4</sub> [M+H]<sup>+</sup>: 636.4048, found: 636.4042.

### 3. General procedure for debenzylation:

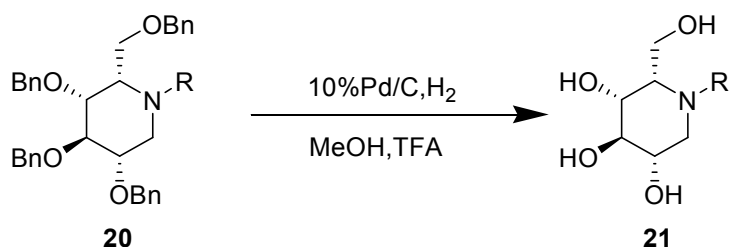

To a solution of compounds **20** (1 mmol) in methanol (14 mL) was bubbled with nitrogen for 30 min at room temperature, then the solution was added to dried and degassed 10% Pd/C (1.0g) followed by 0.2 mL TFA. The mixture was stirred at room temperature with a hydrogen balloon for 24 h until TLC monitored the complete consumption of starting material. After filtered with Celite, the residue was washed with methanol for three times and water two time. The combined filtrate was concentrated and coevaporated with MeOH.

The residue was purified by flash column chromatography with aluminum oxide (MeOH: CHCl<sub>3</sub> = 3 : 1 ~ 1 : 1 or MeOH:EtOAc:NH<sub>4</sub>OH=10:12:3) to afford Compound 21.

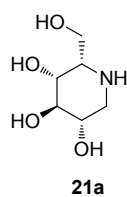

#### L-ido-1-Deoxynojirimycin (21a)

Colorless oil. Yield: 90.1% (from **20a**), 85.8% (from **20a'**). <sup>1</sup>H NMR (400MHz, D<sub>2</sub>O): δ = 3.98 – 3.94 (m, 1H), 3.93 – 3.89 (m, 2H), 3.88 – 3.72 (m, 2H), 3.55 – 3.42 (m, 1H), 3.34 (dd, J = 13.6 Hz, 1H), 3.30 – 3.22 (m, 1H). <sup>13</sup>C NMR (101 MHz, D<sub>2</sub>O): δ = 67.26, 67.15, 66.25, 58.68, 56.47, 44.99. [α]<sub>D</sub><sup>20</sup> = -1.5° (c = 1, H<sub>2</sub>O). LRMS: (ES+) *m/z* = 164.2[M+1].

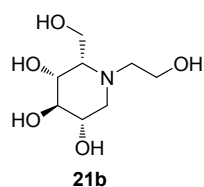

#### N-Hydroxyethyl-L-ido-1-deoxynojirimycin (21b)

Colorless oil. Yield: 86.9%. <sup>1</sup>H NMR (400 MHz, D<sub>2</sub>O): δ = 3.85 – 3.71 (m, 3H), 3.68 – 3.53 (m, 3H), 3.39 (t, J = 9.1 Hz, 1H), 3.07 (d, J = 5.2 Hz, 1H), 2.95 – 2.74 (m, 3H), 2.60 (t, J = 11.7 Hz, 1H). <sup>13</sup>C NMR (101 MHz, D<sub>2</sub>O): δ = 74.32, 70.19, 69.02, 63.43, 59.01, 55.89, 55.36, 50.51. [α]<sub>D</sub><sup>20</sup> = -14.3° (c = 1, H<sub>2</sub>O). HRMS: (ESI+) *m/z* calculated for C<sub>8</sub>H<sub>17</sub>NO<sub>5</sub> [M+Na]<sup>+</sup> 230.0999, found 230.0992.

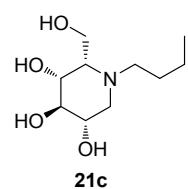

#### N-Butyl-L-ido-1-deoxynojirimycin (21c)

Colorless oil. Yield: 91.7%. <sup>1</sup>H NMR (400 MHz, MeOD): δ = 4.00 – 3.85 (m, 3H), 3.80 (d, J = 3.7 Hz, 1H), 3.74 – 3.62 (m, 1H), 3.44 – 3.29 (m, 1H), 3.29 – 3.18 (m, 1H), 3.16 – 3.00 (m, 3H), 1.78 – 1.57 (m, 2H), 1.49 – 1.36 (m, 2H), 1.00 (t, J = 7.3 Hz, 3H). <sup>13</sup>C NMR (101 MHz, MeOD): δ = 70.83, 70.38, 68.45, 62.61, 57.81, 53.65, 52.16, 26.49, 19.76, 12.70. [α]<sub>D</sub><sup>20</sup> = +55.6° (c = 1, MeOH). HRMS: (ES+) *m/z* = 220.2 [M+1].

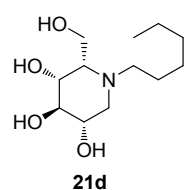

#### N-Hexyl-L-ido-1-deoxynojirimycin (21d)

Colorless oil. Yield: 94.0%. <sup>1</sup>H NMR (400 MHz, MeOD): δ = 3.99 – 3.73 (m, 3H), 3.68 – 3.60 (m, 1H), 3.50 (t, J = 7.3 Hz, 1H), 3.16 (d, J = 4.7 Hz, 1H), 3.05 – 2.68 (m, 4H), 1.71 – 1.50 (m, 2H), 1.44 – 1.26 (m, 6H), 0.93 (t, J = 6.0 Hz, 3H). <sup>13</sup>C NMR (101 MHz, MeOD): δ = 73.13, 71.17, 69.36, 62.77, 56.79, 54.13, 51.72, 31.42, 26.54, 26.25, 22.29, 13.03. [α]<sub>D</sub><sup>20</sup> = +13.4° (c = 1, MeOH). LRMS: (ES+) *m/z* = 248.2 [M+1].

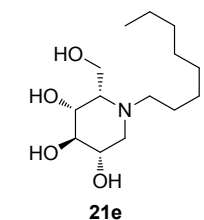

#### N-Octyl-L-ido-1-deoxynojirimycin (21e)

Colorless oil. Yield: 94.3%. <sup>1</sup>H NMR (400 MHz, MeOD): δ = 3.94 – 3.69 (m, 3H), 3.62 – 3.52 (m, 1H), 3.45 (s, 1H), 3.05 (s, 1H), 2.86 – 2.49 (m, 4H), 1.58 – 1.44 (m, 2H), 1.39 – 1.23 (m, 10H), 0.89 (t, J = 6.4 Hz, 3H). <sup>13</sup>C NMR (101 MHz, MeOD): δ = 74.57, 71.30, 69.62, 62.44, 56.38, 54.31, 51.37, 31.66, 29.30, 29.11, 27.34, 27.13, 22.41, 13.42. [α]<sub>D</sub><sup>20</sup> = +24.8° (c = 1, MeOH). LRMS: (ES+) *m/z* = 276.2 [M+1].

## References

1. C. Wang, A. Pettman, J. Bacsá, J. Xiao, *Angew. Chem. Int. Ed.* **2010**, *49*, 7548-7552.
2. A. J. Blacker, M. J. Stirling, M. I. Page, *Org. Process Res. Dev.* **2007**, *11*, 642-648.
3. R. Kawahara, K. Fujita and R. Yamaguchi, *J. Am. Chem. Soc.* **2010**, *132*, 15108-15111.

## II. Spectra Data:

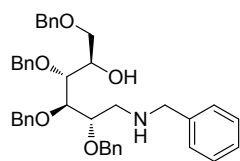

13a

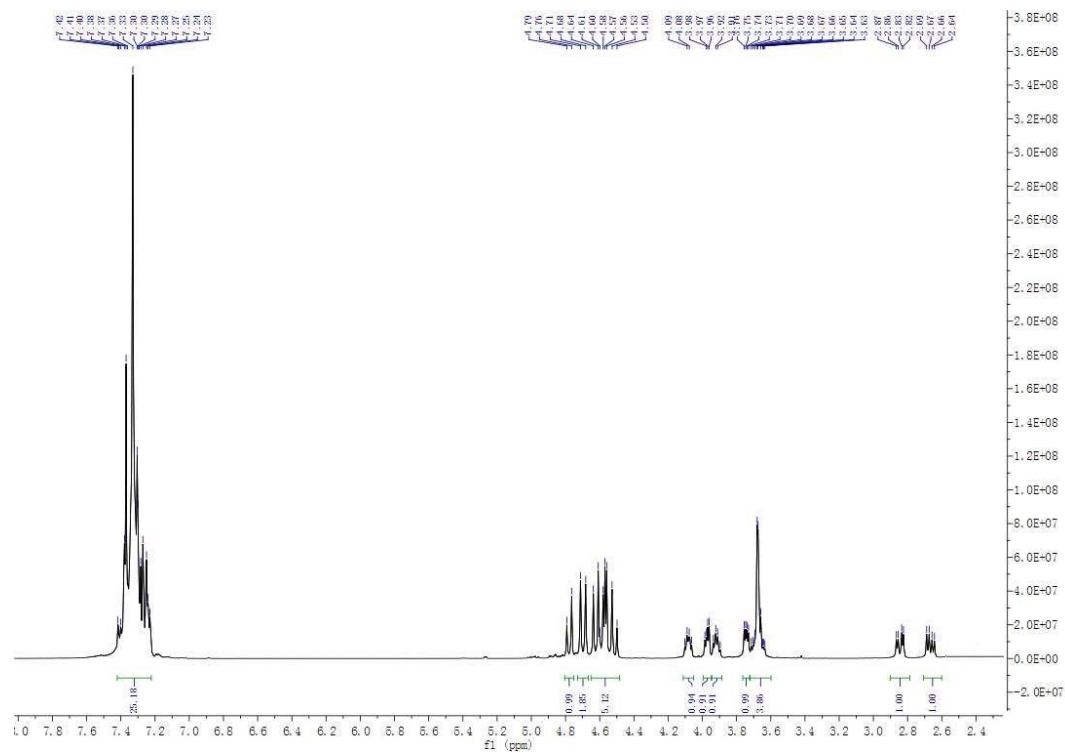



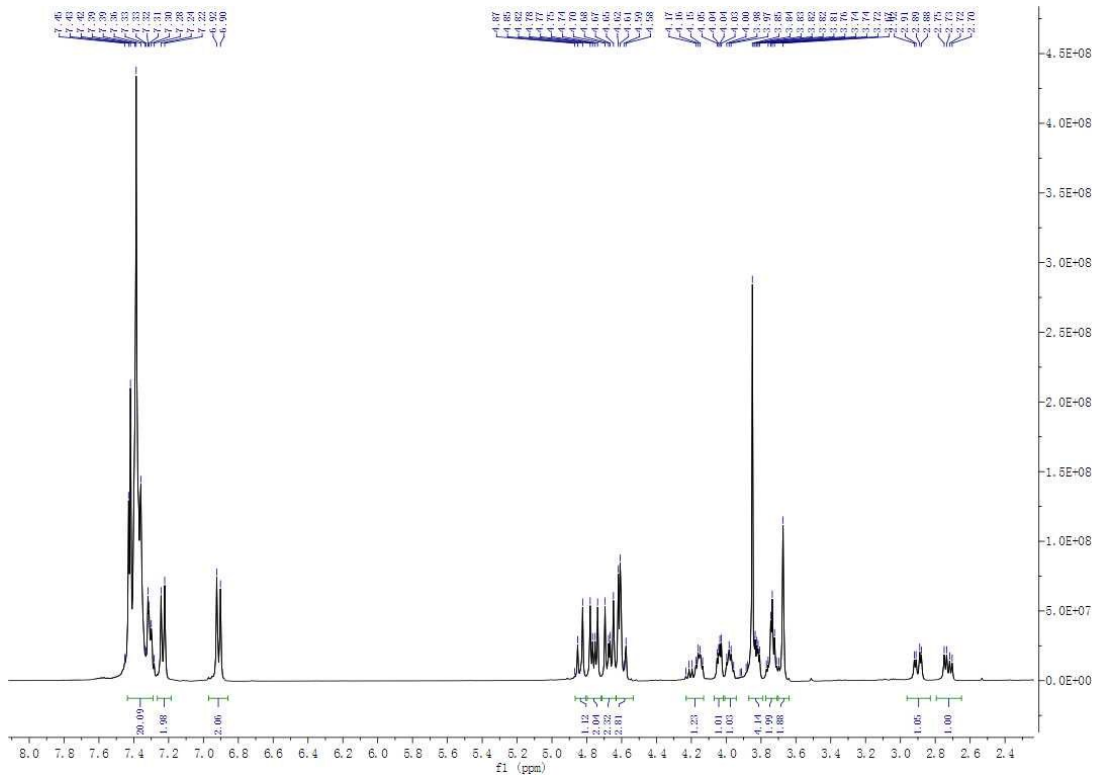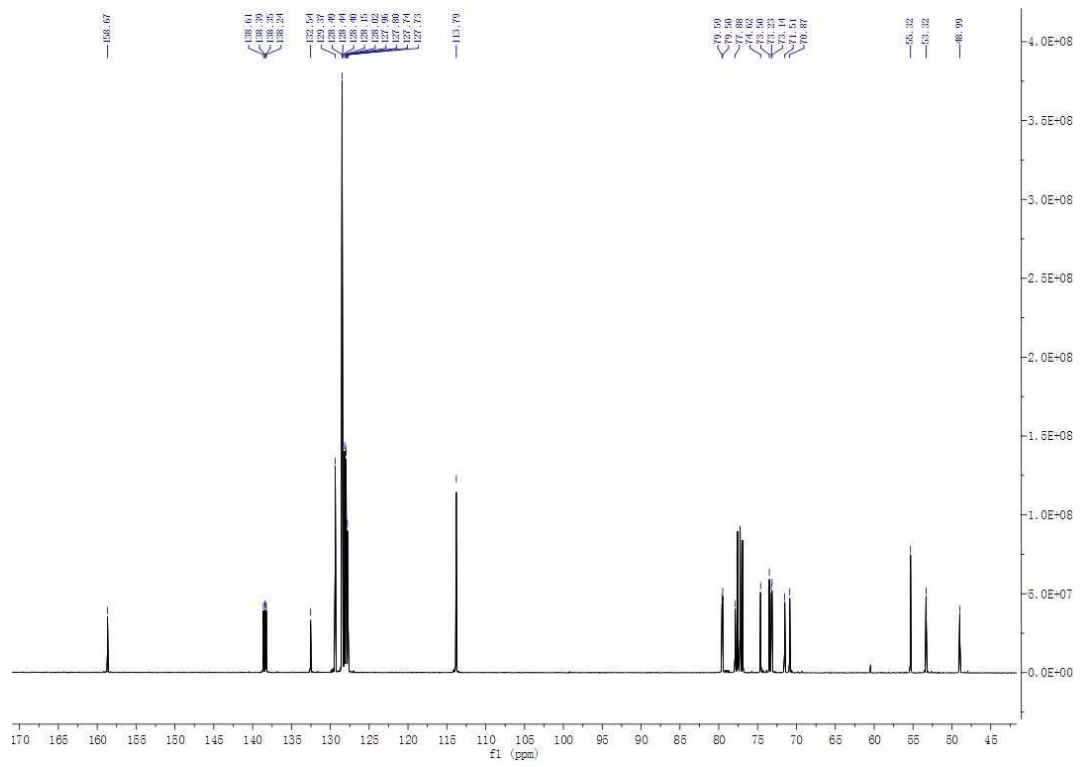



## Display Report

**Analysis Info**

Analysis Name I:\siyida\_he\_zhaokai\_4b.d  
 Method tune\_low 50-500.m  
 Sample Name  
 Comment

Acquisition Date 2016-5-4 16:17:54

Operator NWU  
 Instrument micrOTOF-Q II 10280

**Acquisition Parameter**

|             |            |                       |           |                  |           |
|-------------|------------|-----------------------|-----------|------------------|-----------|
| Source Type | ESI        | Ion Polarity          | Positive  | Set Nebulizer    | 0.4 Bar   |
| Focus       | Not active | Set Capillary         | 4500 V    | Set Dry Heater   | 180 °C    |
| Scan Begin  | 50 m/z     | Set End Plate Offset  | -500 V    | Set Dry Gas      | 4.0 l/min |
| Scan End    | 3000 m/z   | Set Collision Cell RF | 110.0 Vpp | Set Divert Valve | Source    |

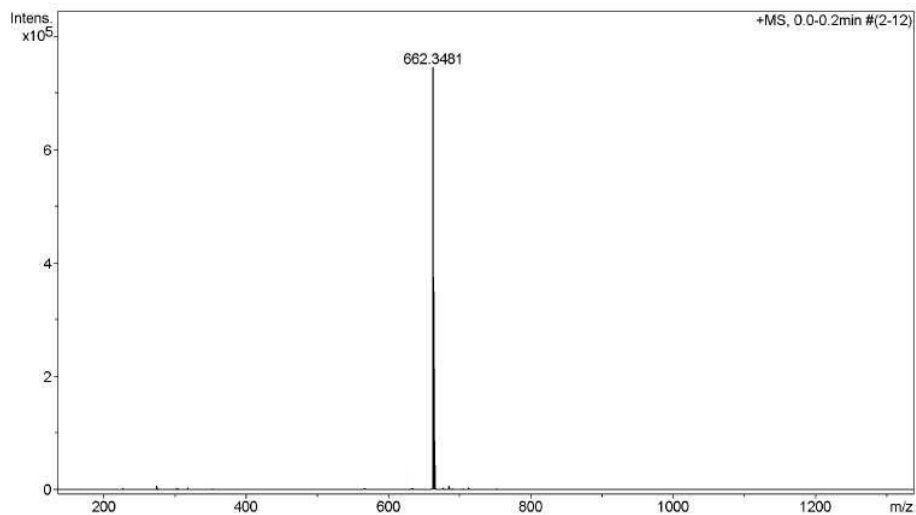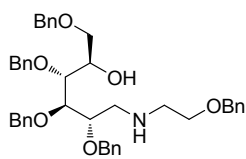

**13b**

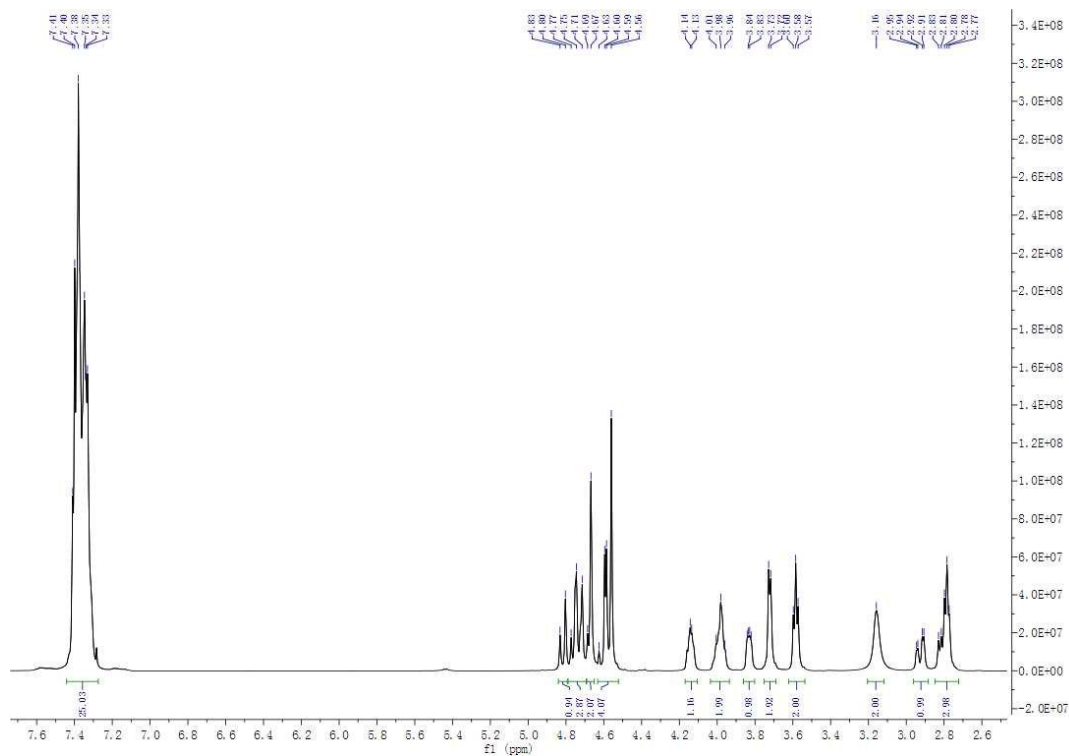

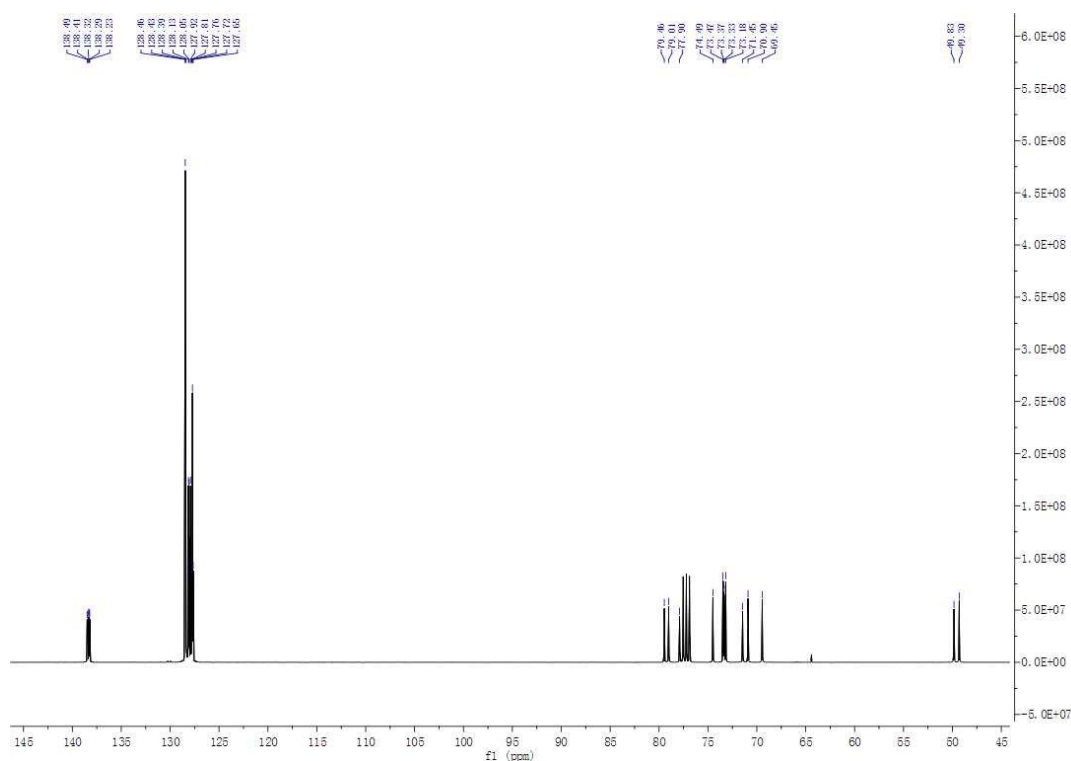

### Display Report

|                      |                           |                     |
|----------------------|---------------------------|---------------------|
| <b>Analysis Info</b> | Acquisition Date          | 2016-5-4 16:19:10   |
| Analysis Name        | I:\siyida_he_zhaokai_4c.d |                     |
| Method               | tune_low 50-500.m         |                     |
| Sample Name          |                           |                     |
| Comment              |                           |                     |
|                      | Operator                  | NWU                 |
|                      | Instrument                | micrOTOF-Q II 10280 |

|                              |            |                       |           |                  |           |
|------------------------------|------------|-----------------------|-----------|------------------|-----------|
| <b>Acquisition Parameter</b> |            |                       |           |                  |           |
| Source Type                  | ESI        | Ion Polarity          | Positive  | Set Nebulizer    | 0.4 Bar   |
| Focus                        | Not active | Set Capillary         | 4500 V    | Set Dry Heater   | 180 °C    |
| Scan Begin                   | 50 m/z     | Set End Plate Offset  | -500 V    | Set Dry Gas      | 4.0 l/min |
| Scan End                     | 3000 m/z   | Set Collision Cell RF | 110.0 Vpp | Set Divert Valve | Source    |

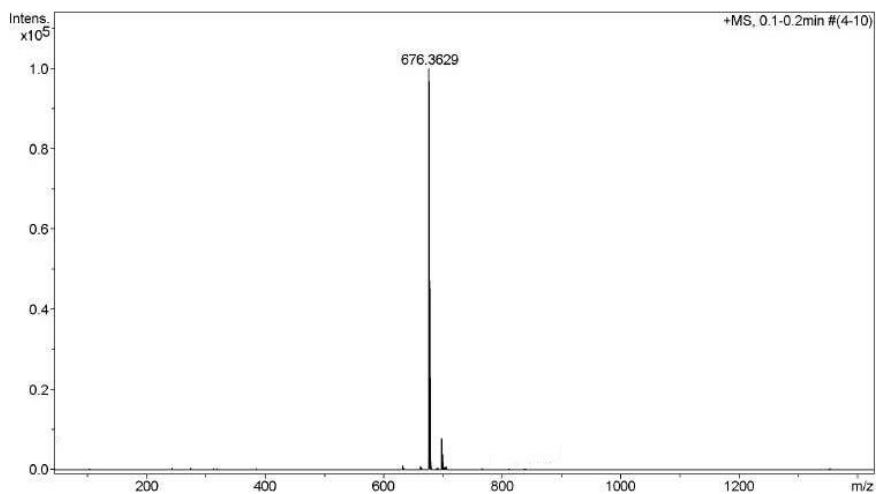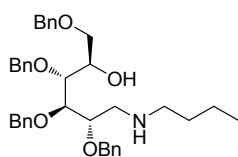

13c

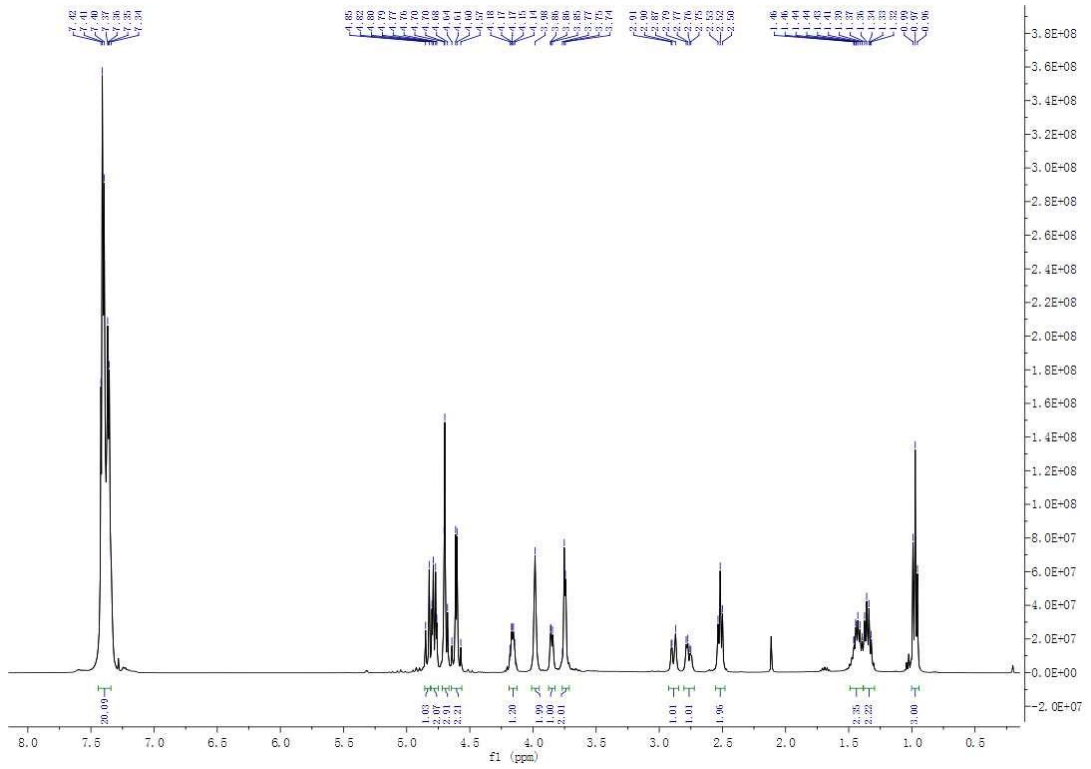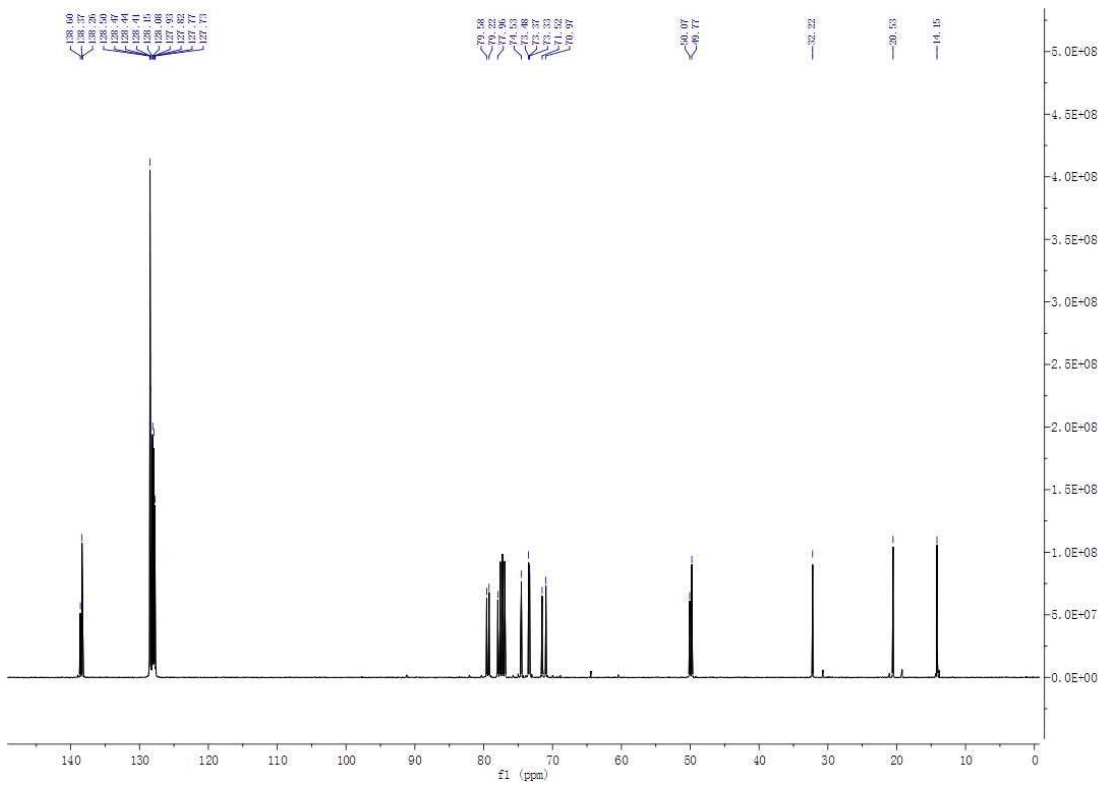

# Display Report

## Analysis Info

Analysis Name l:\siykda\_he\_zhaokai\_4d.d  
Method tune\_low 50-500.m  
Sample Name  
Comment

Acquisition Date 2016-5-4 16:20:56

Operator NWU  
Instrument micrOTOF-Q II 10280

## Acquisition Parameter

|             |            |                       |           |                  |           |
|-------------|------------|-----------------------|-----------|------------------|-----------|
| Source Type | ESI        | Ion Polarity          | Positive  | Set Nebulizer    | 0.4 Bar   |
| Focus       | Not active | Set Capillary         | 4500 V    | Set Dry Heater   | 180 °C    |
| Scan Begin  | 50 m/z     | Set End Plate Offset  | -500 V    | Set Dry Gas      | 4.0 l/min |
| Scan End    | 3000 m/z   | Set Collision Cell RF | 110.0 Vpp | Set Divert Valve | Source    |

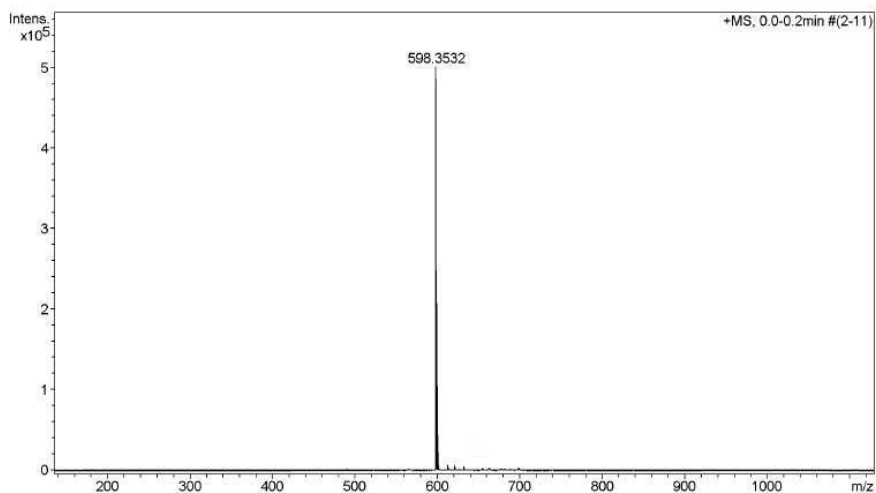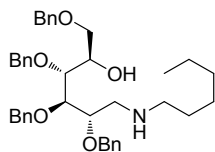

13d

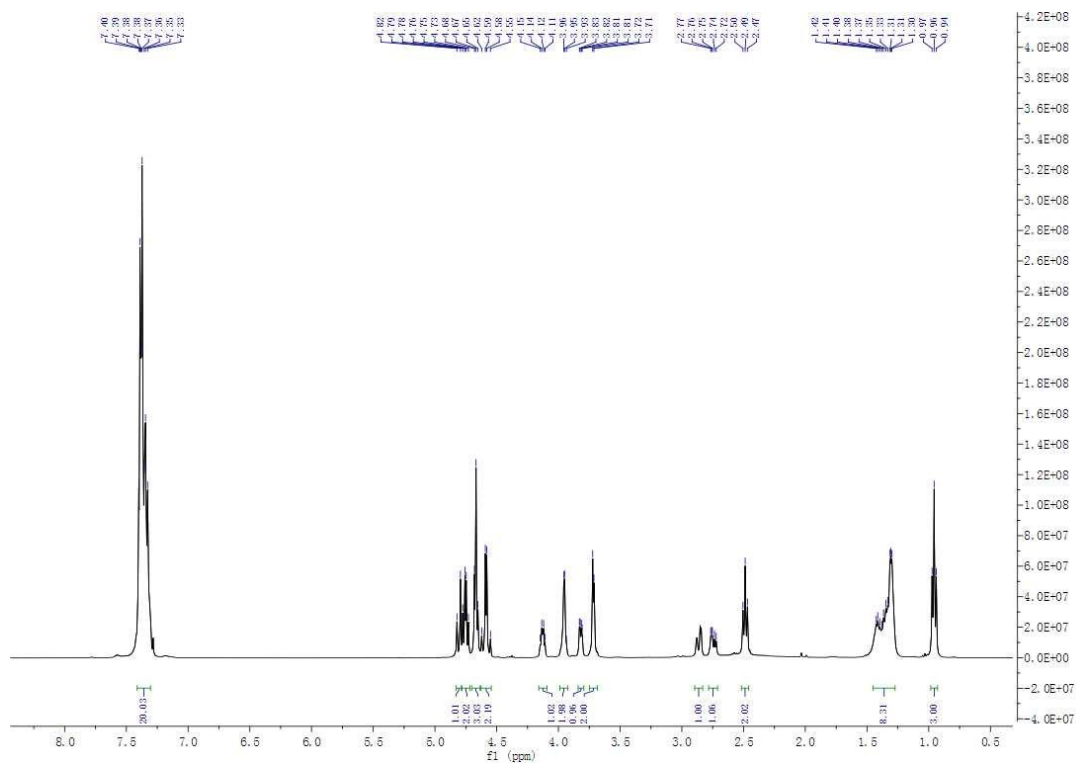

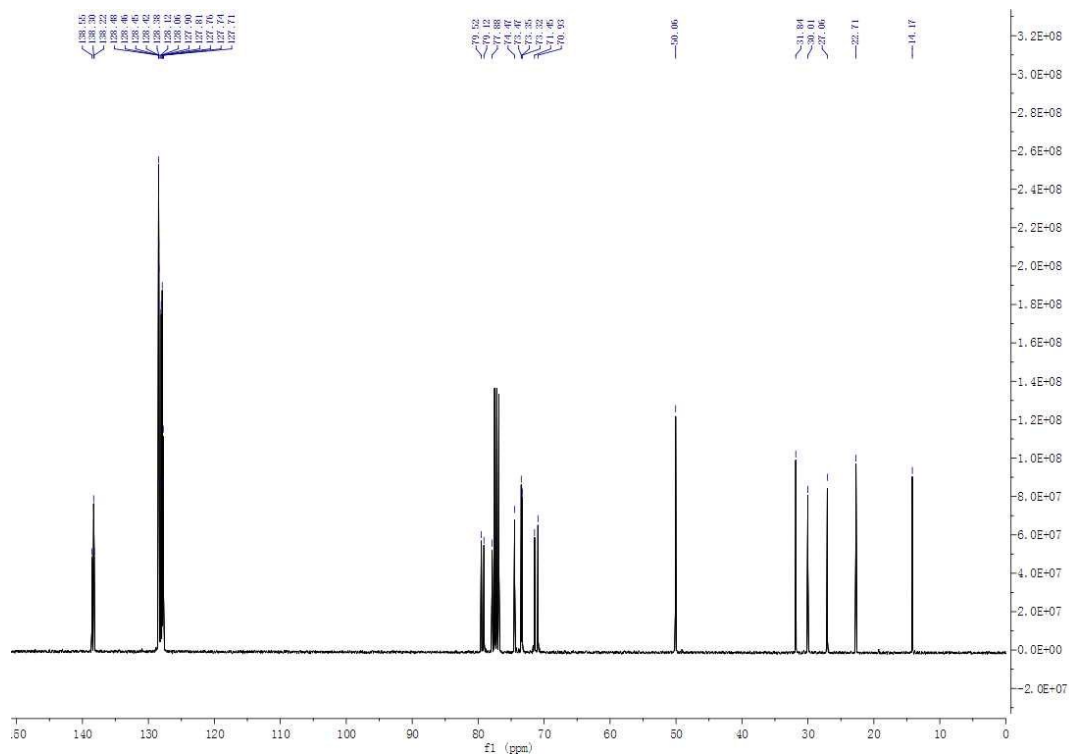

### Display Report

#### Analysis Info

Analysis Name: l'siyida\_he\_zhaokai\_4e.d  
 Method: tune\_low 50-500.m  
 Sample Name:  
 Comment:

Acquisition Date: 2016-5-4 16:24:48

Operator: NWU  
 Instrument: micrOTOF-Q II 10280

#### Acquisition Parameter

|             |            |                       |           |                  |           |
|-------------|------------|-----------------------|-----------|------------------|-----------|
| Source Type | ESI        | Ion Polarity          | Positive  | Set Nebulizer    | 0.4 Bar   |
| Focus       | Not active | Set Capillary         | 4500 V    | Set Dry Heater   | 180 °C    |
| Scan Begin  | 50 m/z     | Set End Plate Offset  | -500 V    | Set Dry Gas      | 4.0 l/min |
| Scan End    | 3000 m/z   | Set Collision Cell RF | 110.0 Vpp | Set Divert Valve | Source    |

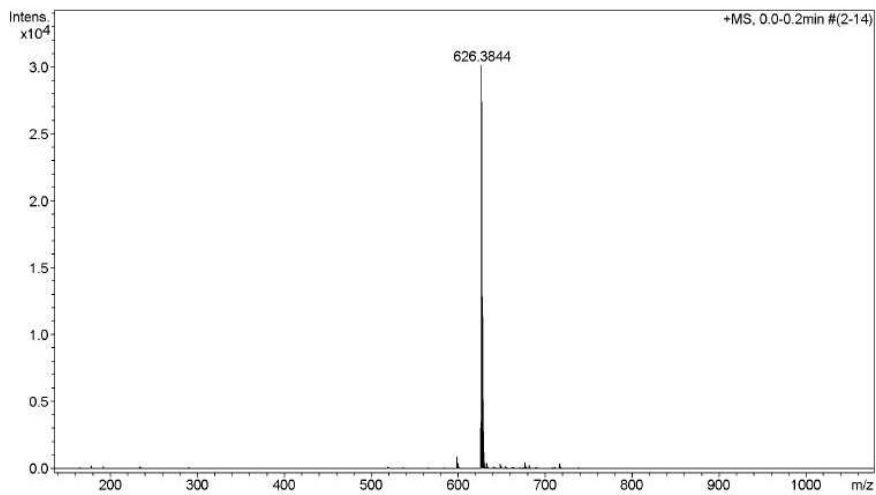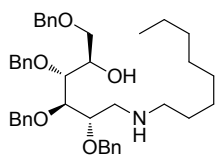

13e

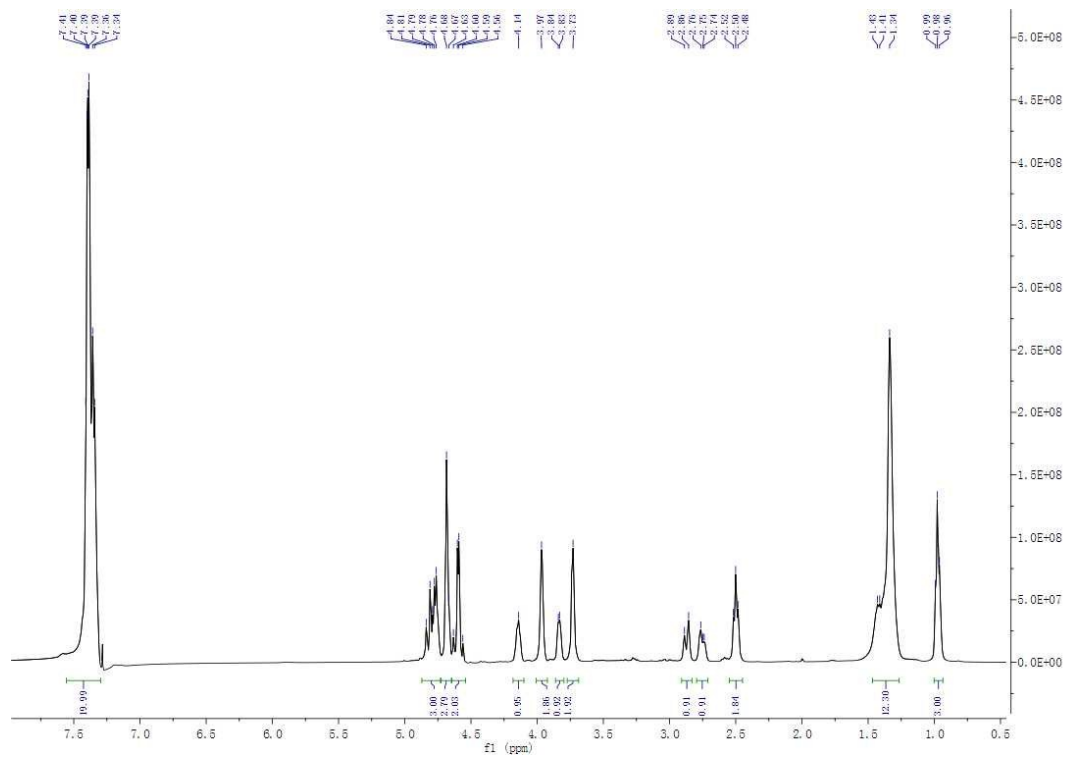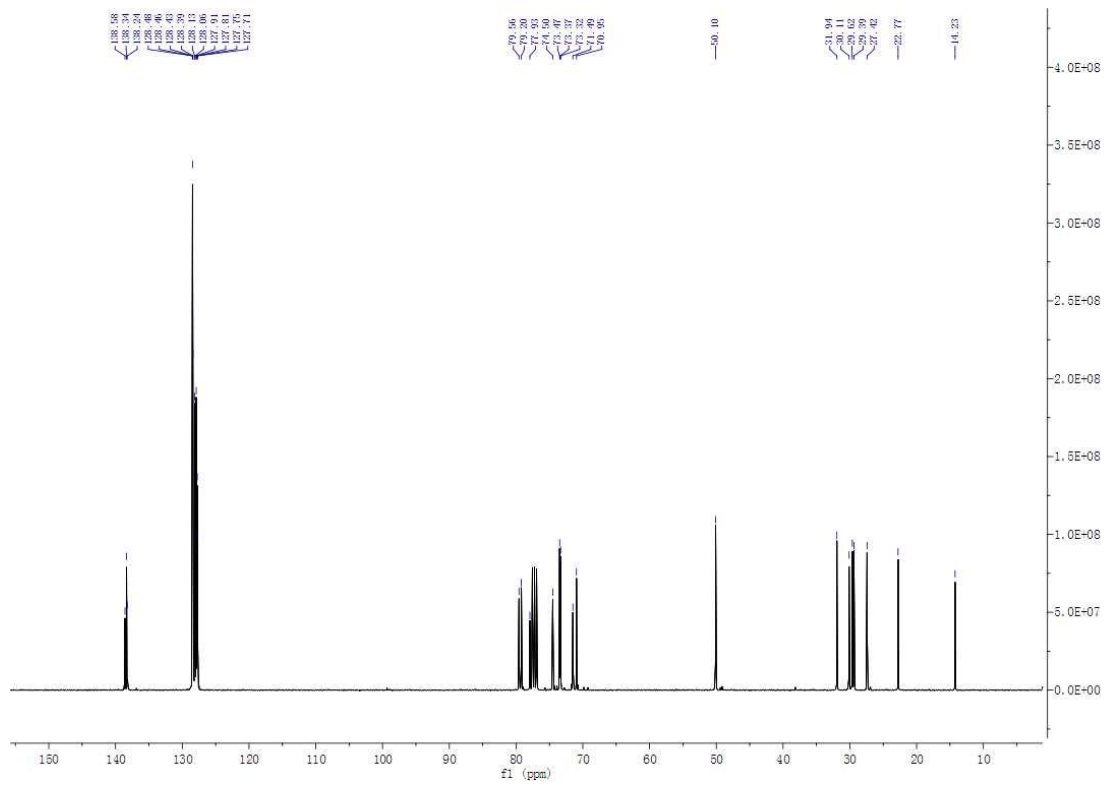

## Display Report

### Analysis Info

Analysis Name l:\siyida\_he\_zhaokai\_4f.d  
Method tune\_low 50-500.m  
Sample Name  
Comment

Acquisition Date 2016-5-4 16:26:47

Operator NWU  
Instrument micrOTOF-Q II 10280

### Acquisition Parameter

|             |            |                       |           |                  |           |
|-------------|------------|-----------------------|-----------|------------------|-----------|
| Source Type | ESI        | Ion Polarity          | Positive  | Set Nebulizer    | 0.4 Bar   |
| Focus       | Not active | Set Capillary         | 4500 V    | Set Dry Heater   | 180 °C    |
| Scan Begin  | 50 m/z     | Set End Plate Offset  | -500 V    | Set Dry Gas      | 4.0 l/min |
| Scan End    | 3000 m/z   | Set Collision Cell RF | 110.0 Vpp | Set Divert Valve | Source    |

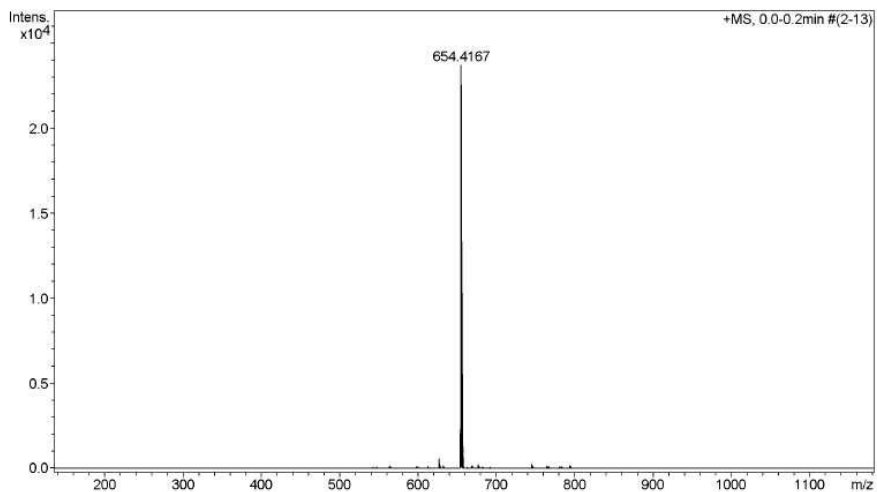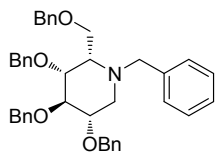

20a

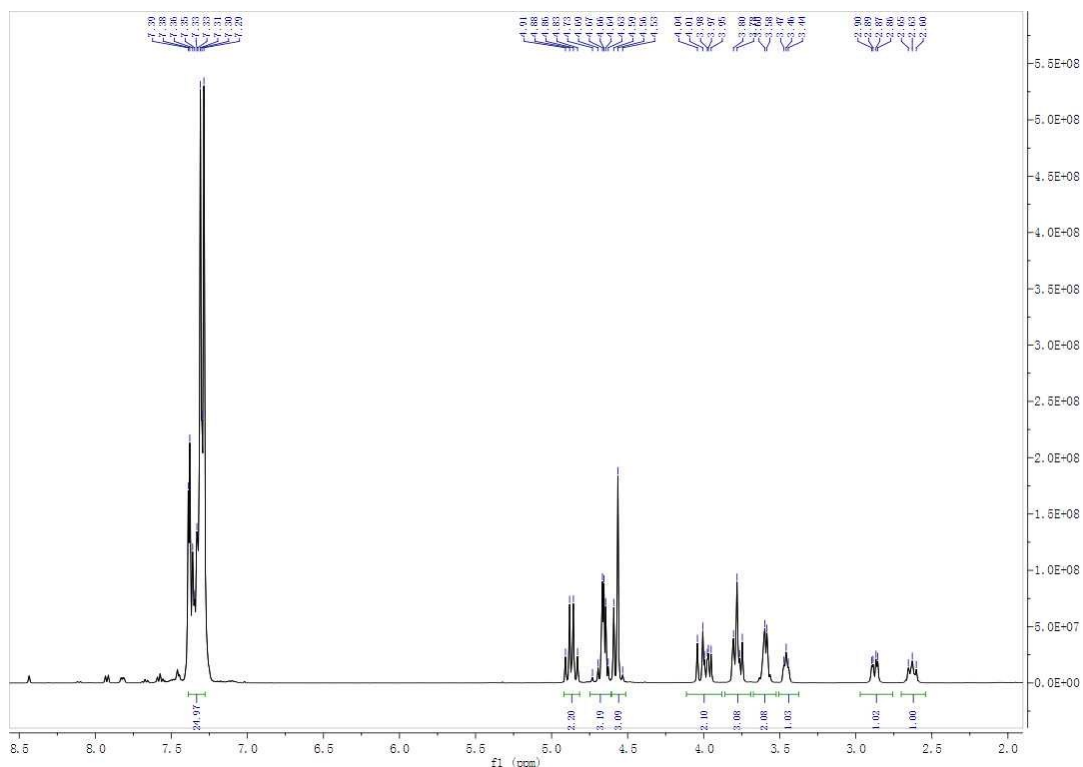

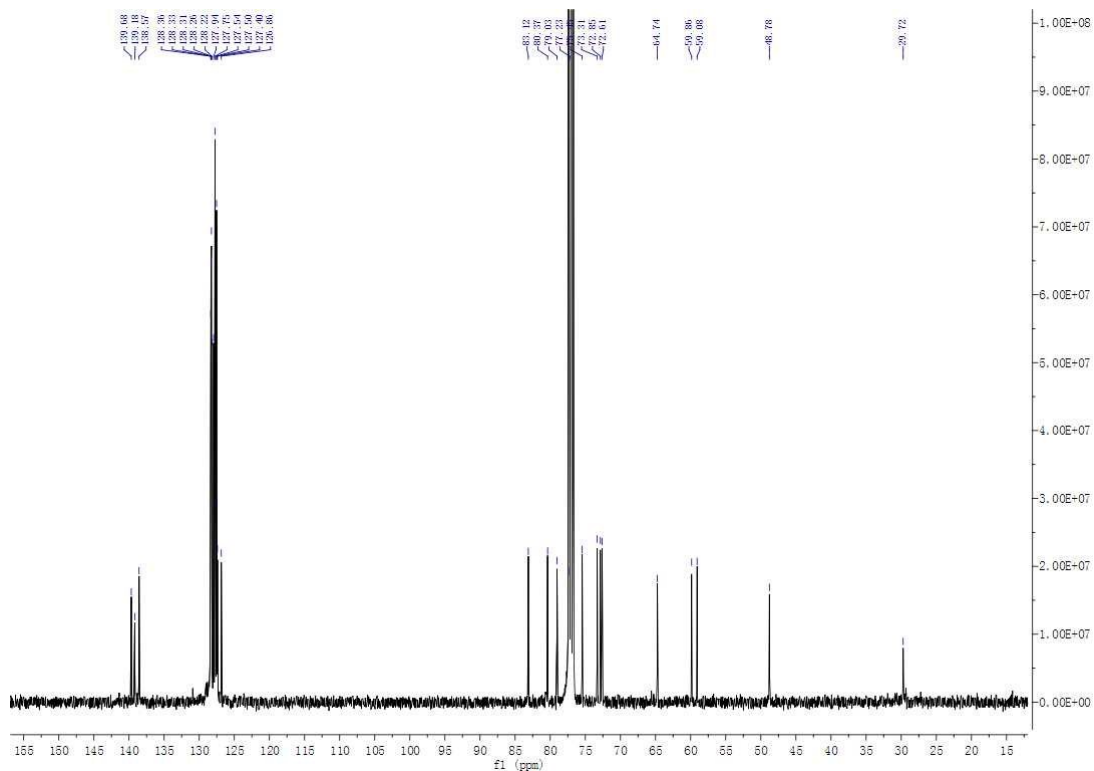

### Display Report

#### Analysis Info

Analysis Name: I:\siyida\_he\_zhaokai\_5a.d  
 Method: tune\_low 50-500.m  
 Sample Name:  
 Comment:

Acquisition Date: 2016-5-4 16:41:07

Operator: NWU  
 Instrument: micrOTOF-Q II 10280

#### Acquisition Parameter

|             |            |                       |           |                  |           |
|-------------|------------|-----------------------|-----------|------------------|-----------|
| Source Type | ESI        | Ion Polarity          | Positive  | Set Nebulizer    | 0.4 Bar   |
| Focus       | Not active | Set Capillary         | 4500 V    | Set Dry Heater   | 180 °C    |
| Scan Begin  | 50 m/z     | Set End Plate Offset  | -500 V    | Set Dry Gas      | 4.0 l/min |
| Scan End    | 3000 m/z   | Set Collision Cell RF | 110.0 Vpp | Set Divert Valve | Source    |

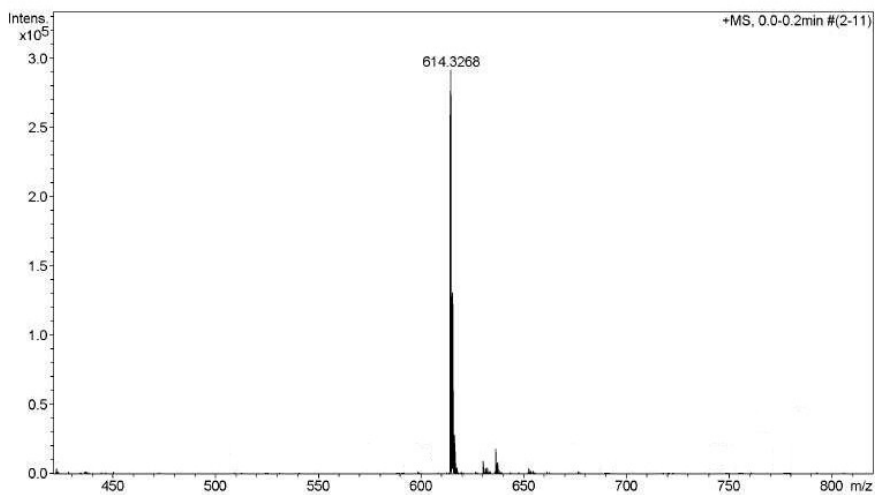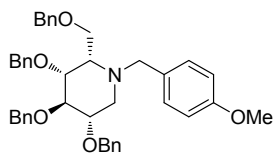

20a'



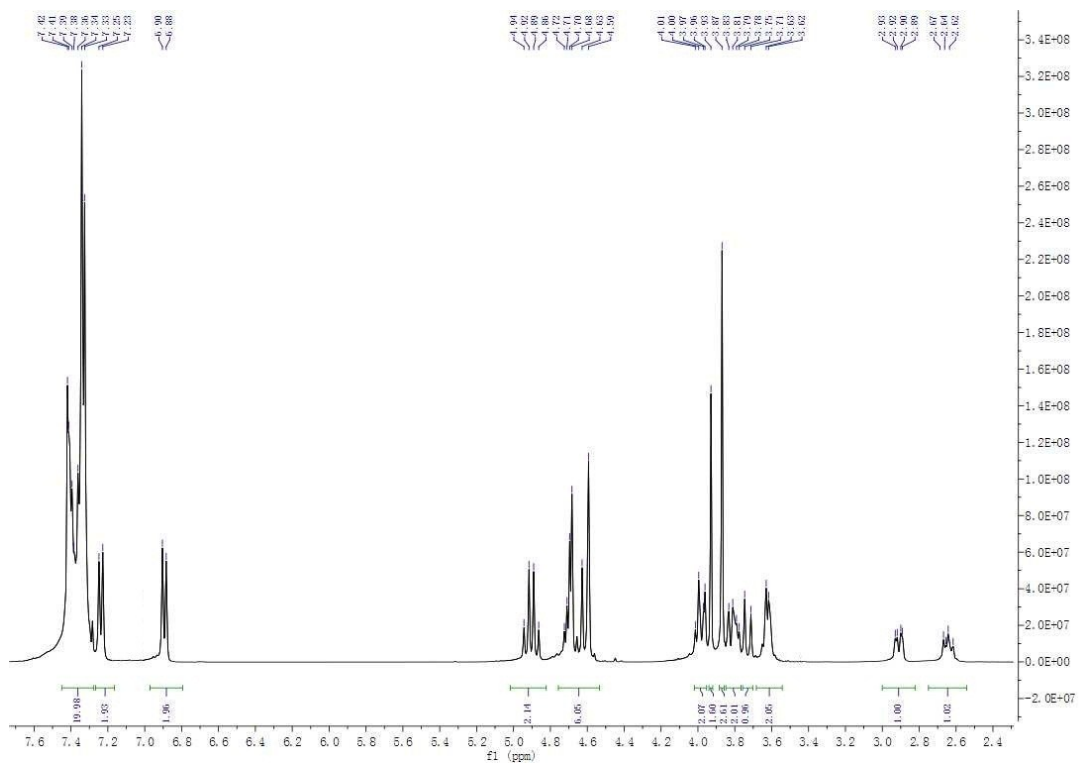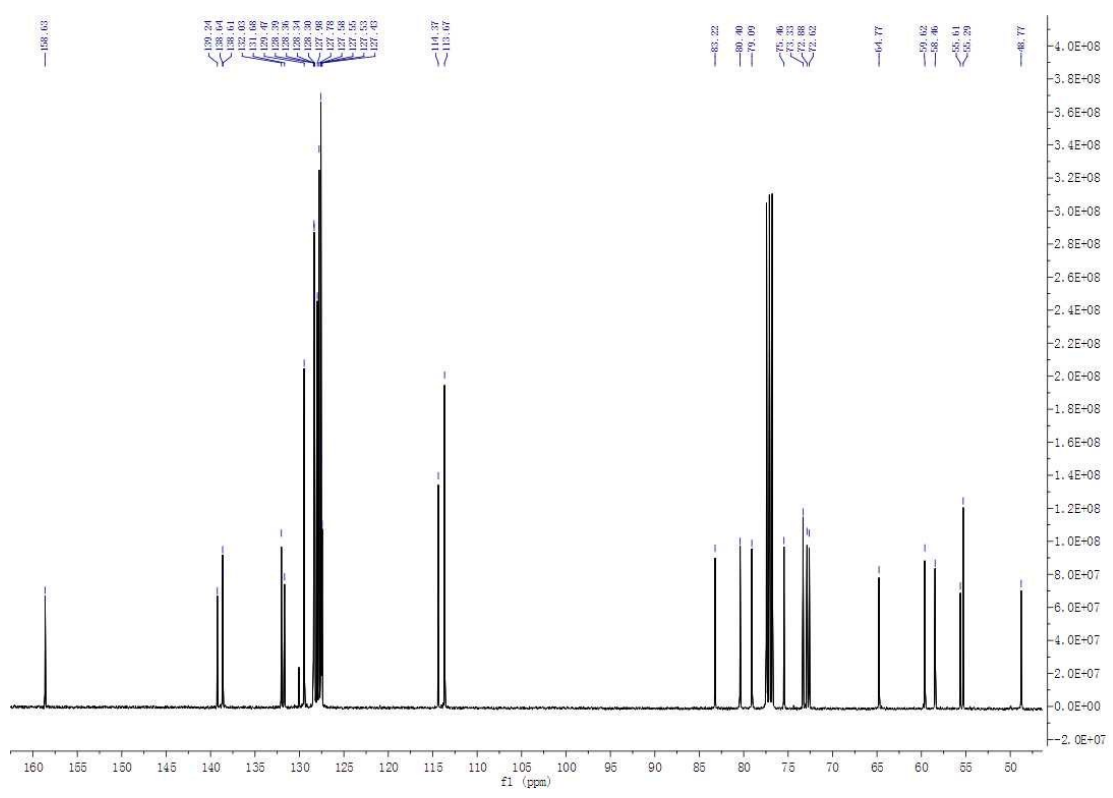

## Display Report

**Analysis Info**

Analysis Name: I:\siyida\_he\_zhaokai\_5b.d  
 Method: tune\_low 50-500.m  
 Sample Name:  
 Comment:

Acquisition Date: 2016-5-4 16:42:07

Operator: NWU  
 Instrument: micrOTOF-Q II 10280

**Acquisition Parameter**

|             |            |                       |           |                  |           |
|-------------|------------|-----------------------|-----------|------------------|-----------|
| Source Type | ESI        | Ion Polarity          | Positive  | Set Nebulizer    | 0.4 Bar   |
| Focus       | Not active | Set Capillary         | 4500 V    | Set Dry Heater   | 180 °C    |
| Scan Begin  | 50 m/z     | Set End Plate Offset  | -500 V    | Set Dry Gas      | 4.0 l/min |
| Scan End    | 3000 m/z   | Set Collision Cell RF | 110.0 Vpp | Set Divert Valve | Source    |

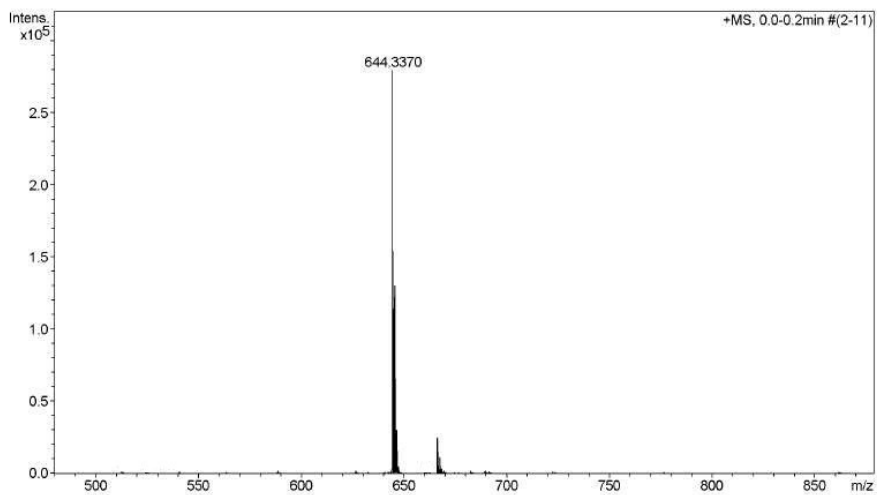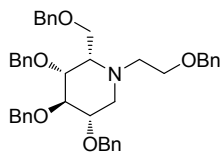

**20b**

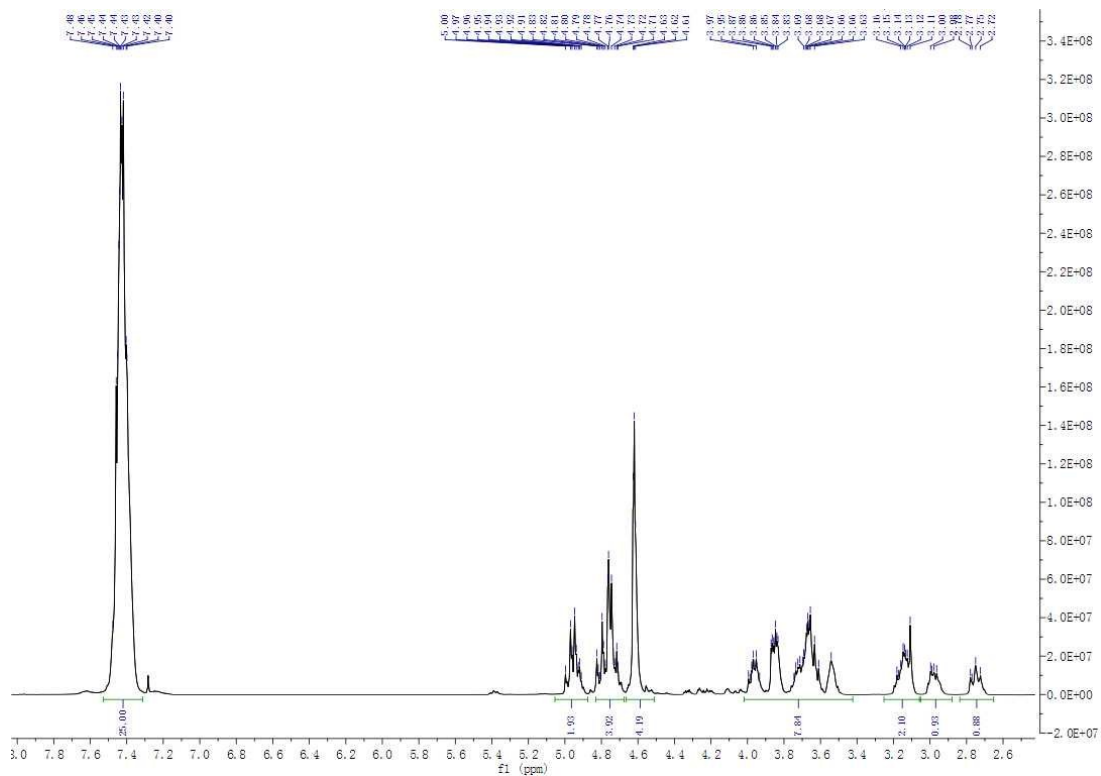

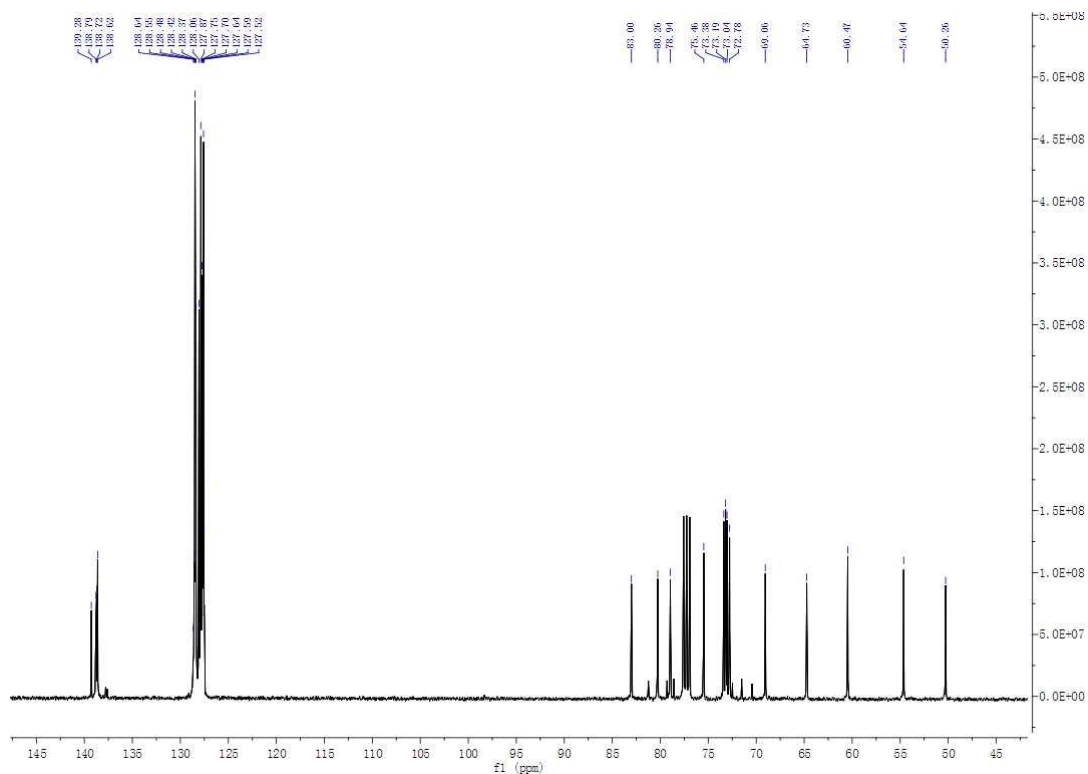

## Display Report

| Analysis Info |                           | Acquisition Date  |                      |
|---------------|---------------------------|-------------------|----------------------|
| Analysis Name | I:\siyida_he_zhaokai_5c.d | 2016-5-4 16:49:26 |                      |
| Method        | tune_low 50-500.m         | Operator          | NWU                  |
| Sample Name   |                           | Instrument        | micrOT-OF-Q II 10280 |
| Comment       |                           |                   |                      |

| Acquisition Parameter |            |                       |           |                  |           |
|-----------------------|------------|-----------------------|-----------|------------------|-----------|
| Source Type           | ESI        | Ion Polarity          | Positive  | Set Nebulizer    | 0.4 Bar   |
| Focus                 | Not active | Set Capillary         | 4500 V    | Set Dry Heater   | 180 °C    |
| Scan Begin            | 50 m/z     | Set End Plate Offset  | -500 V    | Set Dry Gas      | 4.0 l/min |
| Scan End              | 3000 m/z   | Set Collision Cell RF | 110.0 Vpp | Set Divert Valve | Source    |

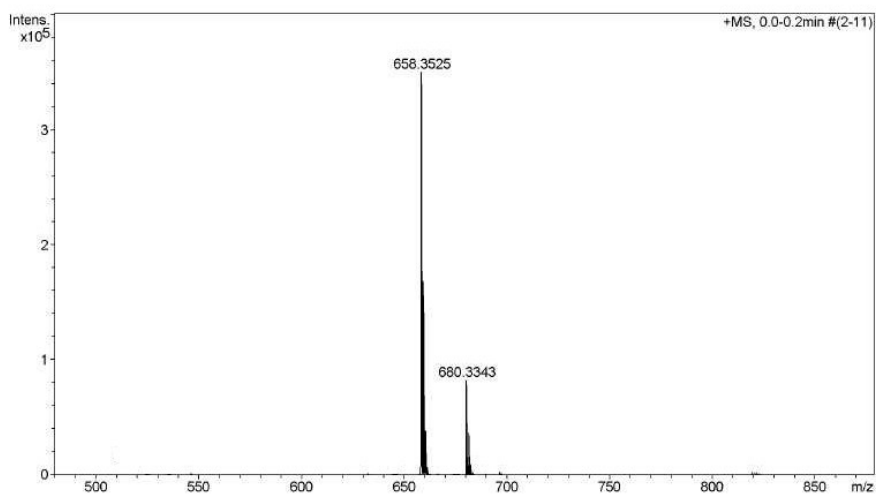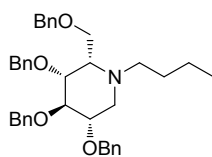

20c

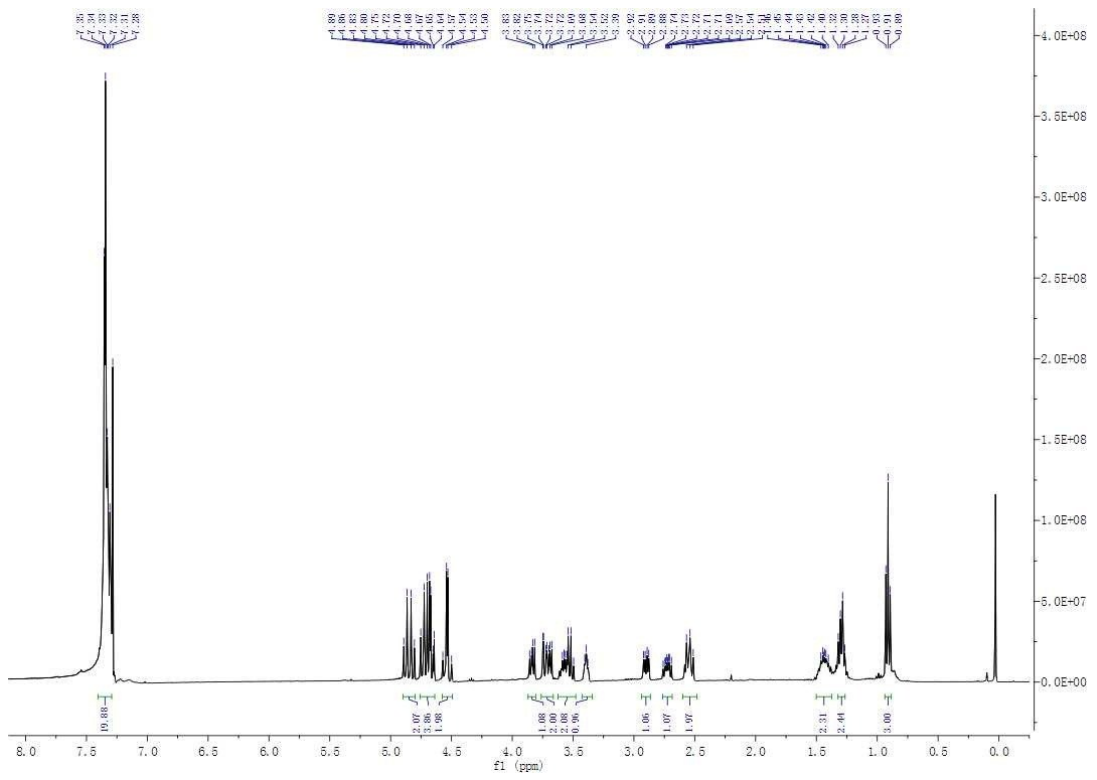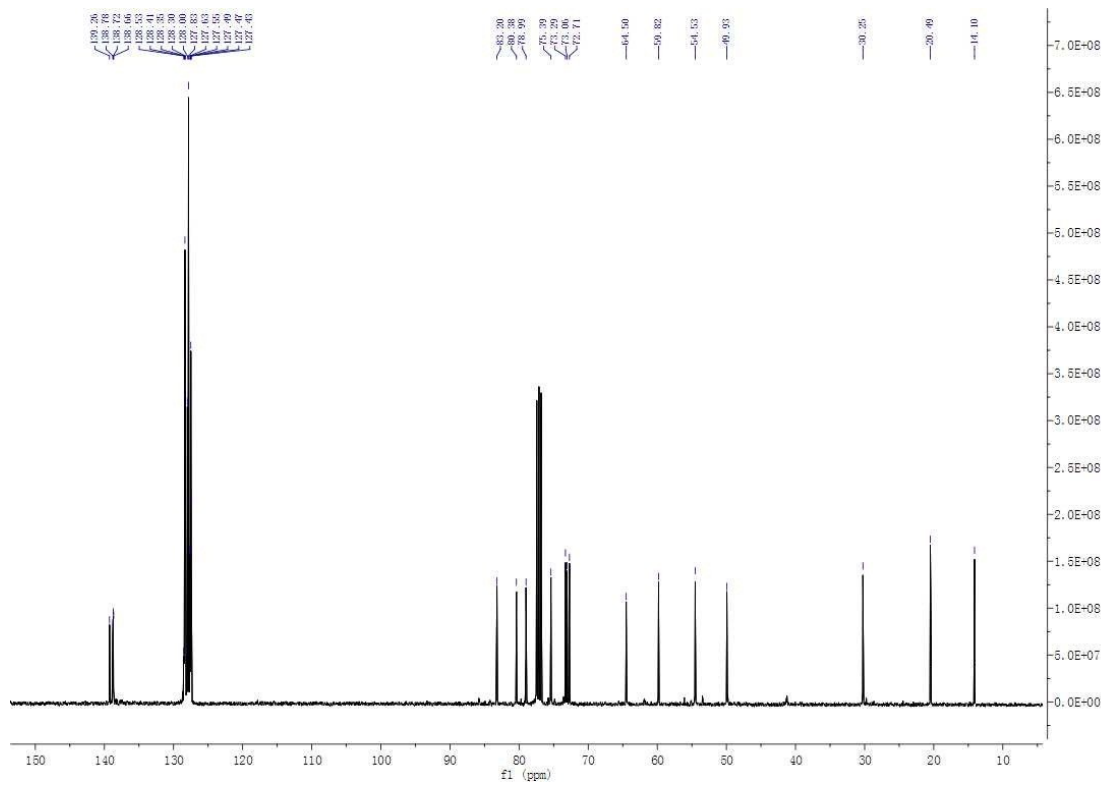

## Display Report

**Analysis Info**

Analysis Name: l'siyida\_he\_zhaokai\_5d.d  
 Method: tune\_low 50-500.m  
 Sample Name:  
 Comment:

Acquisition Date: 2016-5-4 16:50:20

Operator: NWU  
 Instrument: micrOTOF-Q II 10280

**Acquisition Parameter**

|             |            |                       |           |                  |           |
|-------------|------------|-----------------------|-----------|------------------|-----------|
| Source Type | ESI        | Ion Polarity          | Positive  | Set Nebulizer    | 0.4 Bar   |
| Focus       | Not active | Set Capillary         | 4500 V    | Set Dry Heater   | 180 °C    |
| Scan Begin  | 50 m/z     | Set End Plate Offset  | -500 V    | Set Dry Gas      | 4.0 l/min |
| Scan End    | 3000 m/z   | Set Collision Cell RF | 110.0 Vpp | Set Divert Valve | Source    |

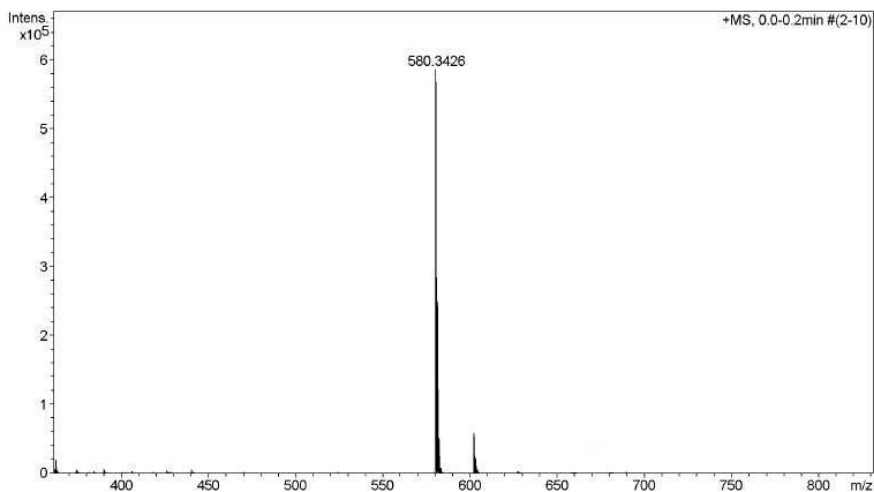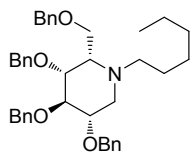

**20d**

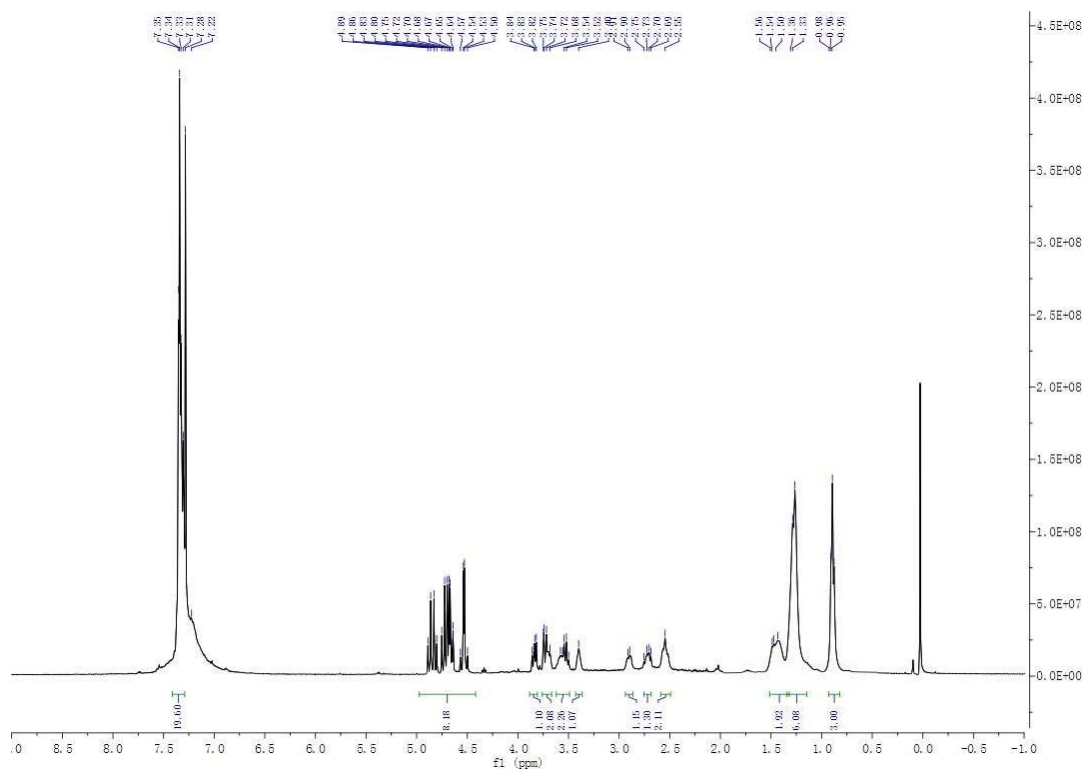

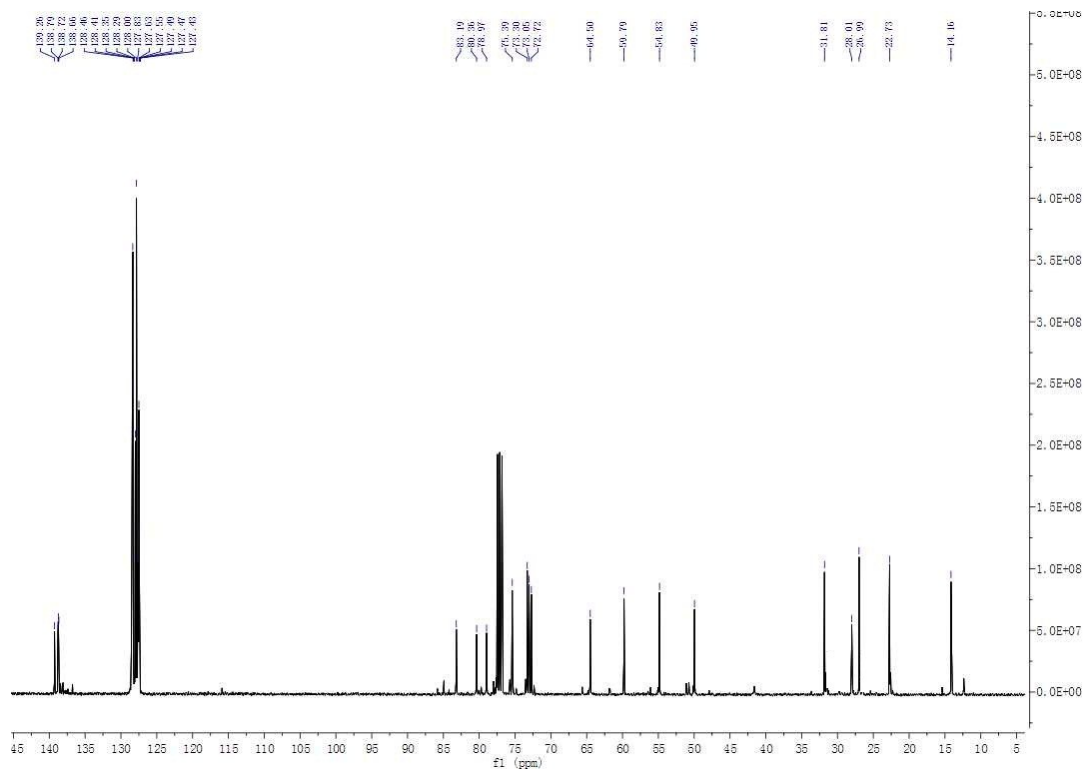

### Display Report

#### Analysis Info

Analysis Name I:\siyida\_he\_zhaokai\_5e.d  
 Method tune\_low 50-500.m  
 Sample Name  
 Comment

Acquisition Date 2016-5-4 16:51:17

Operator NWU  
 Instrument micrOTOF-Q II 10280

#### Acquisition Parameter

|             |            |                       |           |                  |           |
|-------------|------------|-----------------------|-----------|------------------|-----------|
| Source Type | ESI        | Ion Polarity          | Positive  | Set Nebulizer    | 0.4 Bar   |
| Focus       | Not active | Set Capillary         | 4500 V    | Set Dry Heater   | 180 °C    |
| Scan Begin  | 50 m/z     | Set End Plate Offset  | -500 V    | Set Dry Gas      | 4.0 l/min |
| Scan End    | 3000 m/z   | Set Collision Cell RF | 110.0 Vpp | Set Divert Valve | Source    |

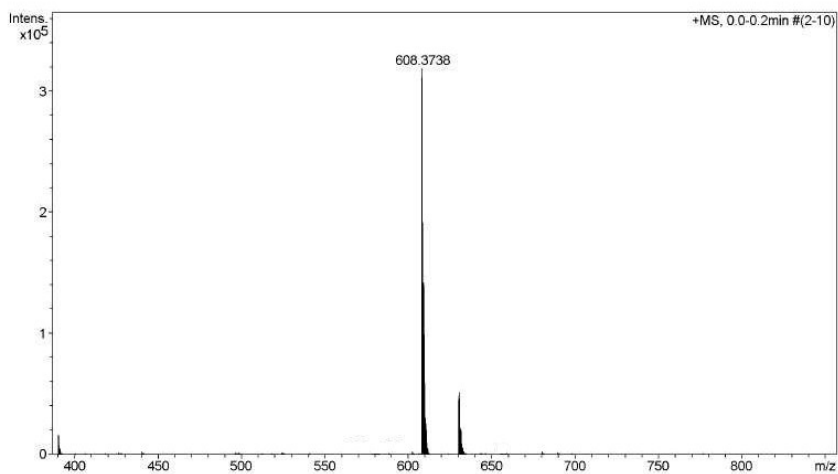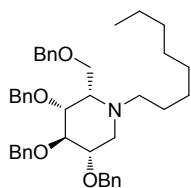

20e

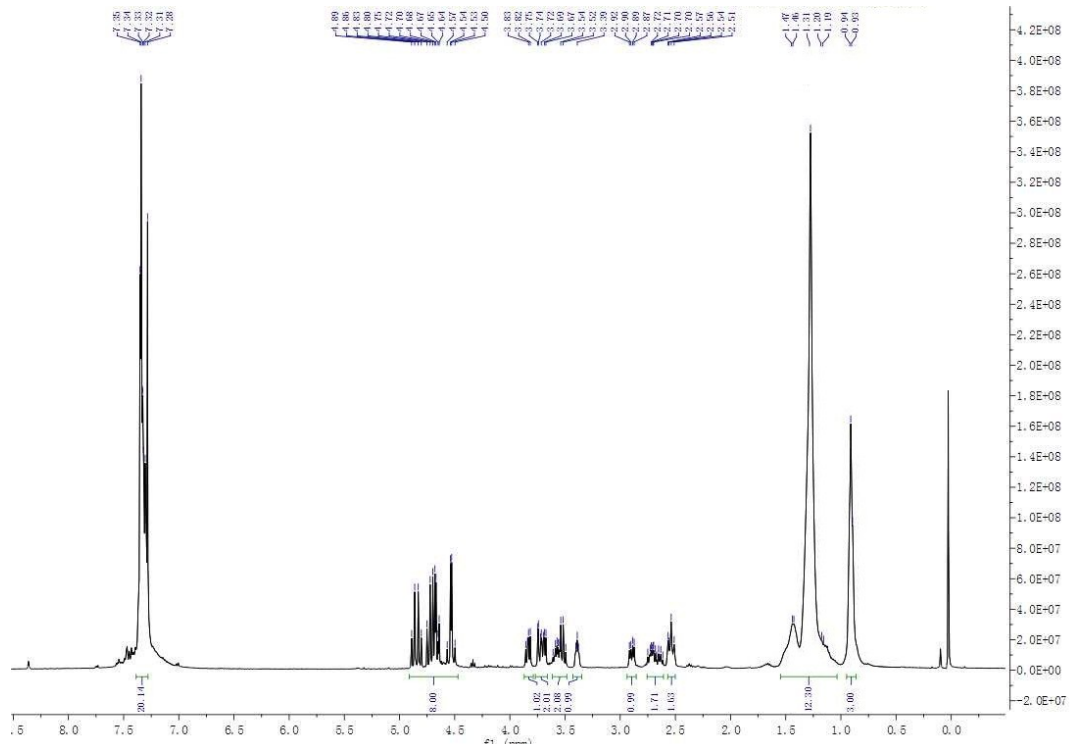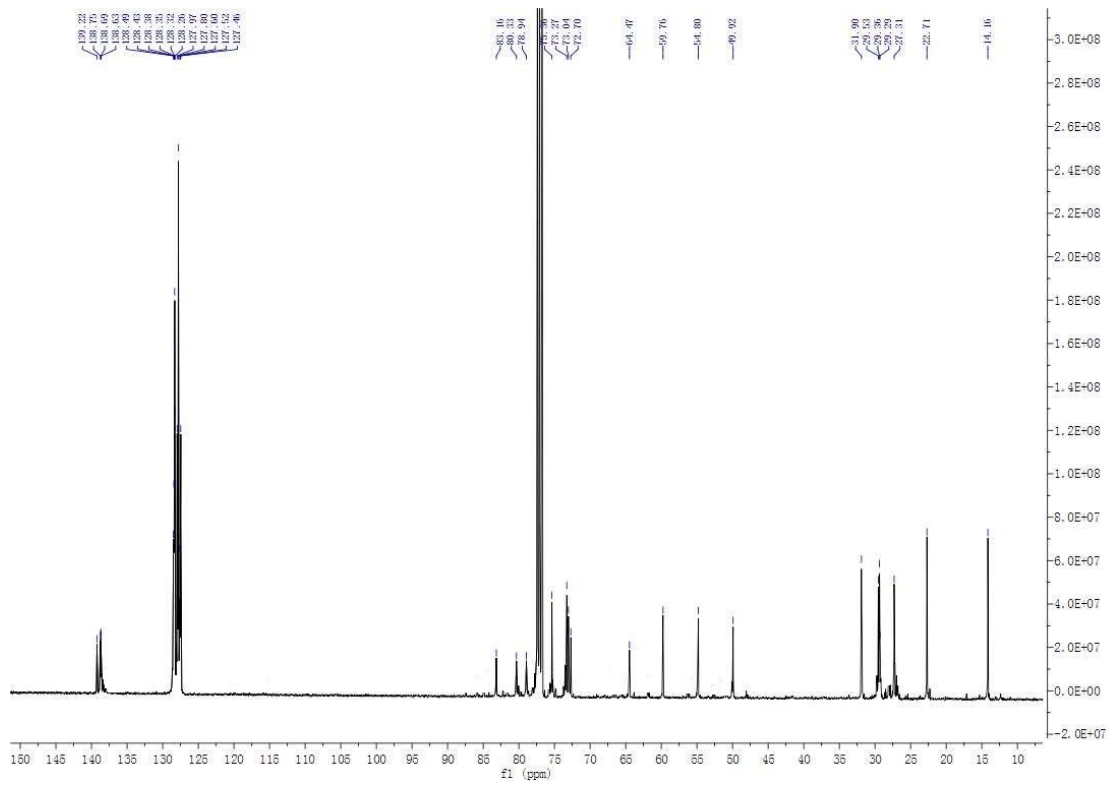

# Display Report

## Analysis Info

Analysis Name l:\siyida\_he\_zhaokai\_5f.d  
Method tune\_low 50-500.m  
Sample Name  
Comment

Acquisition Date 2016-5-4 16:52:28

Operator NWU  
Instrument micrOTOF-Q II 10280

## Acquisition Parameter

|             |            |                       |           |                  |           |
|-------------|------------|-----------------------|-----------|------------------|-----------|
| Source Type | ESI        | Ion Polarity          | Positive  | Set Nebulizer    | 0.4 Bar   |
| Focus       | Not active | Set Capillary         | 4500 V    | Set Dry Heater   | 180 °C    |
| Scan Begin  | 50 m/z     | Set End Plate Offset  | -500 V    | Set Dry Gas      | 4.0 l/min |
| Scan End    | 3000 m/z   | Set Collision Cell RF | 110.0 Vpp | Set Divert Valve | Source    |

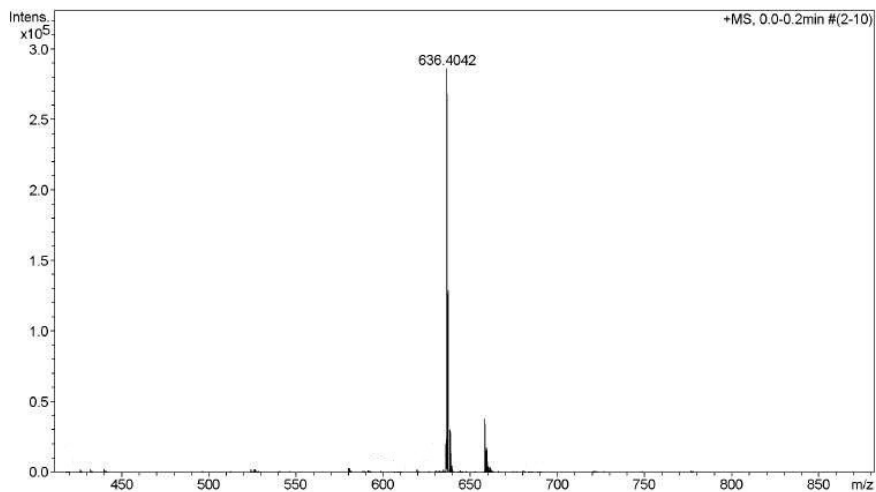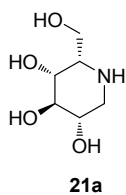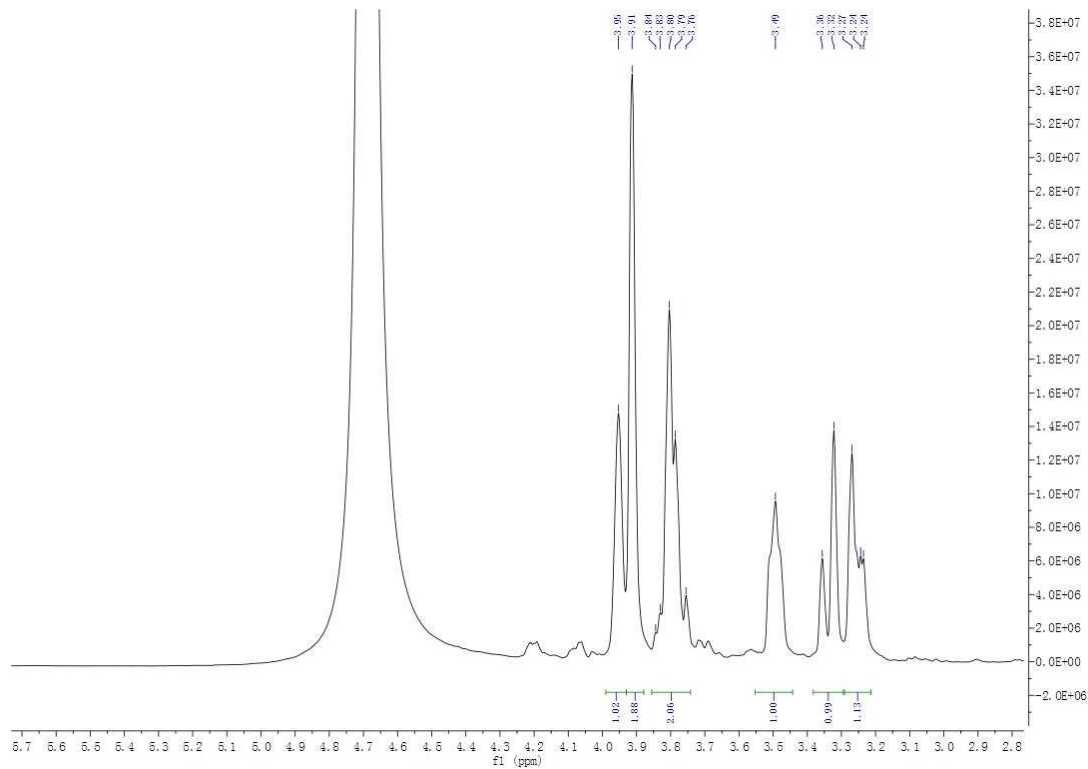



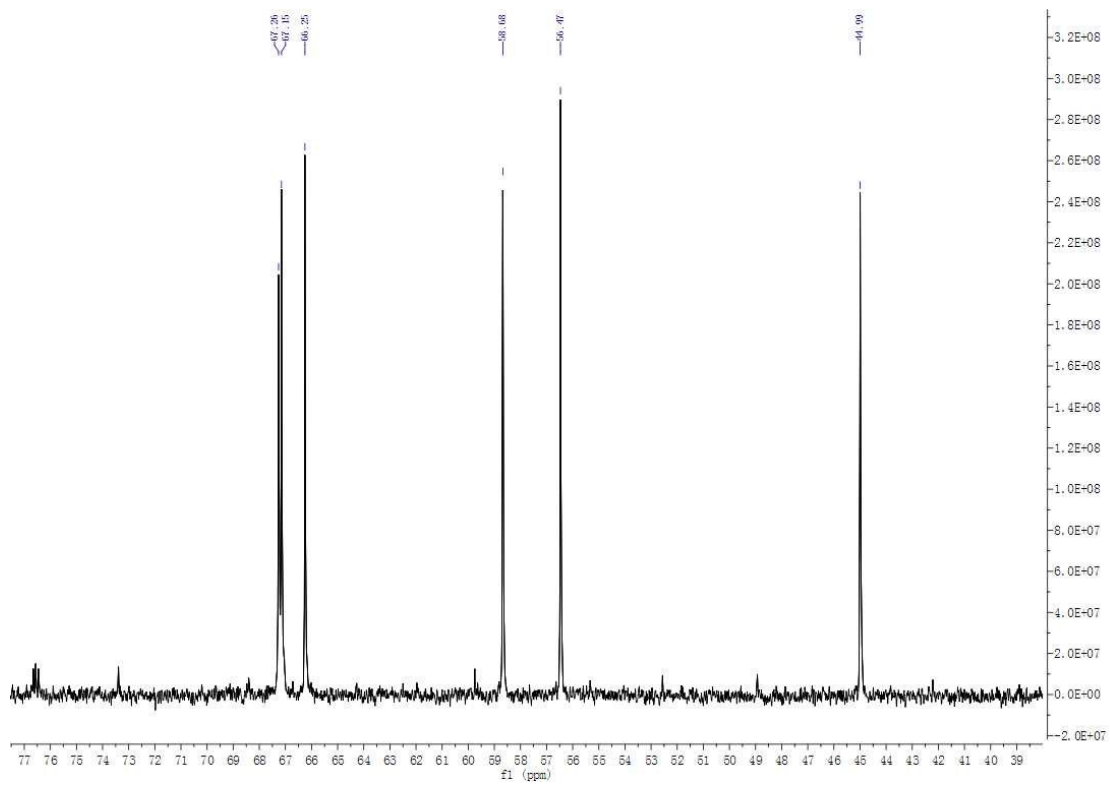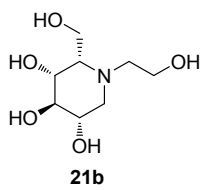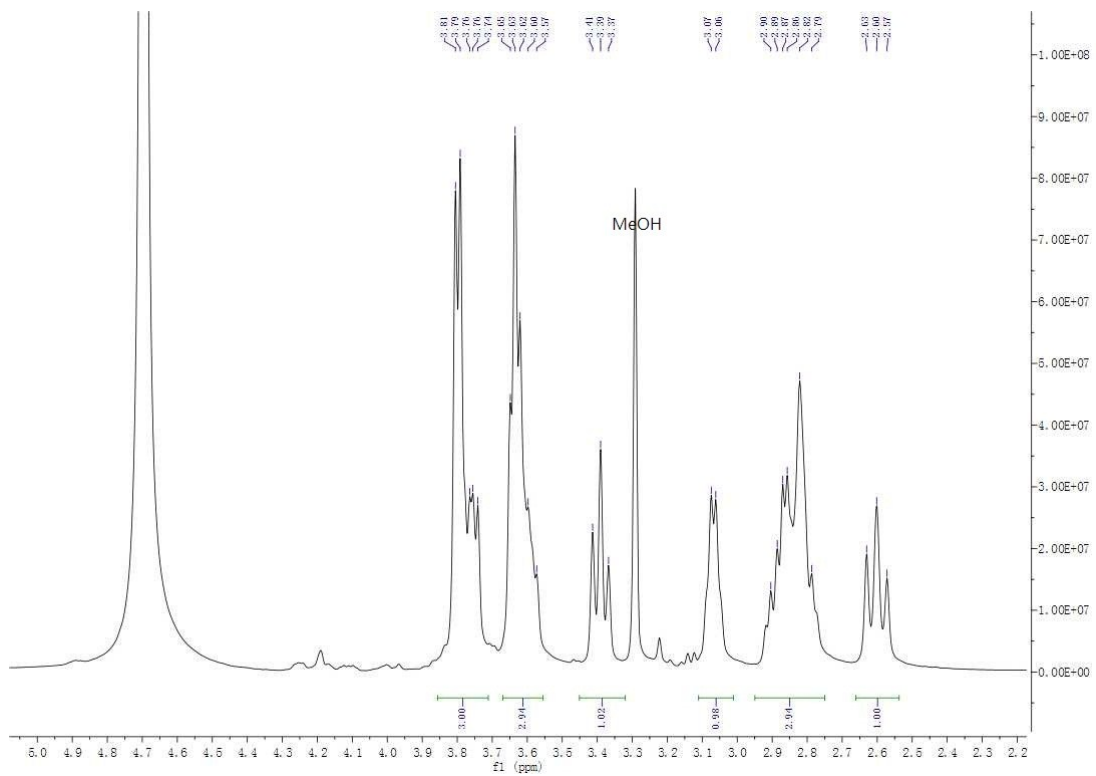

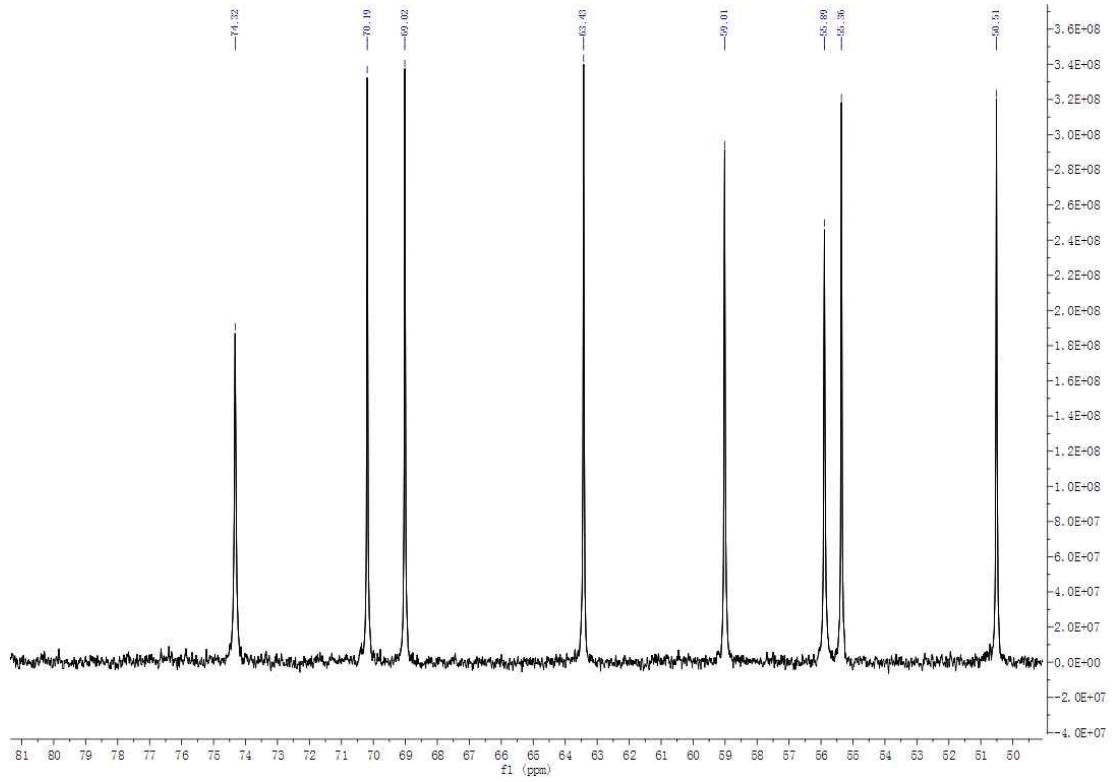

## Display Report

### Analysis Info

Analysis Name I:\siyida\_he\_zhaokai\_8c.d  
 Method tune\_low 50-500.m  
 Sample Name  
 Comment

Acquisition Date 2016-5-4 17:00:06

Operator NWU  
 Instrument micrOTOF-Q II 10280

### Acquisition Parameter

|             |            |                       |           |                  |           |
|-------------|------------|-----------------------|-----------|------------------|-----------|
| Source Type | ESI        | Ion Polarity          | Positive  | Set Nebulizer    | 0.4 Bar   |
| Focus       | Not active | Set Capillary         | 4500 V    | Set Dry Heater   | 180 °C    |
| Scan Begin  | 50 m/z     | Set End Plate Offset  | -500 V    | Set Dry Gas      | 4.0 l/min |
| Scan End    | 3000 m/z   | Set Collision Cell RF | 110.0 Vpp | Set Divert Valve | Source    |

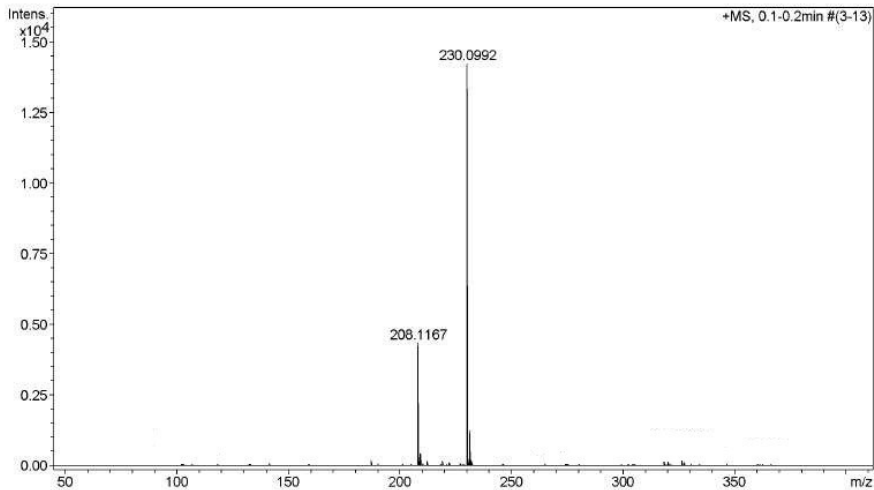

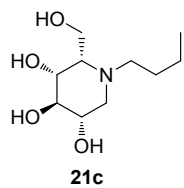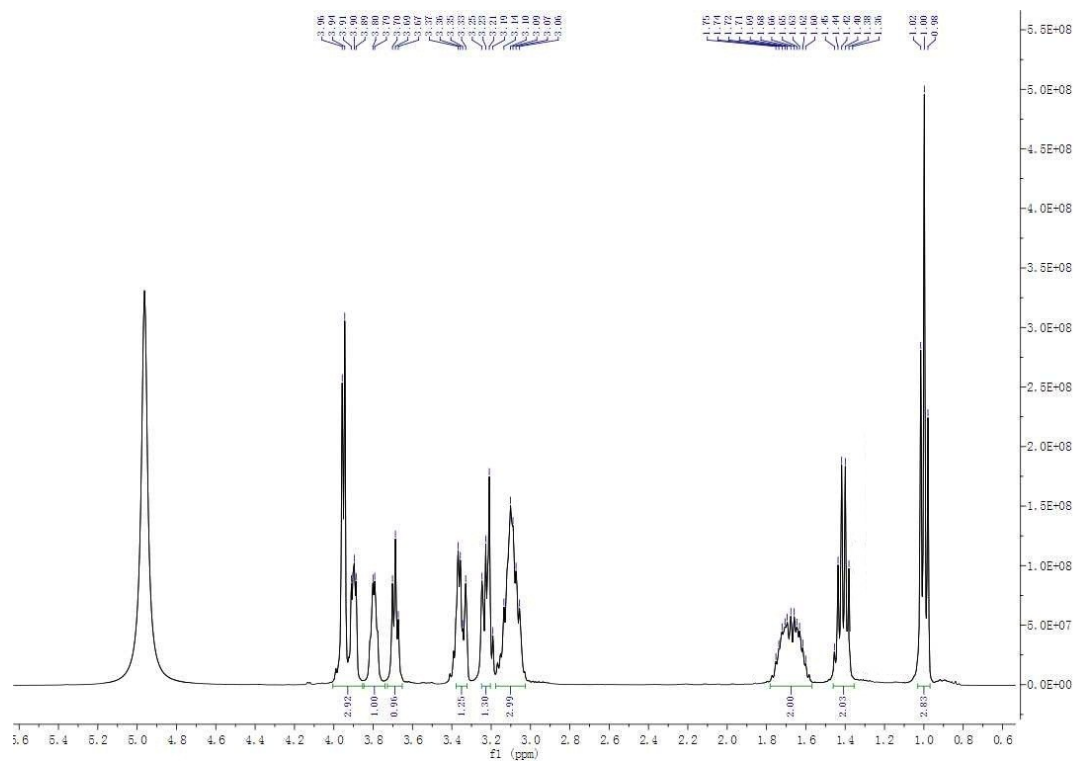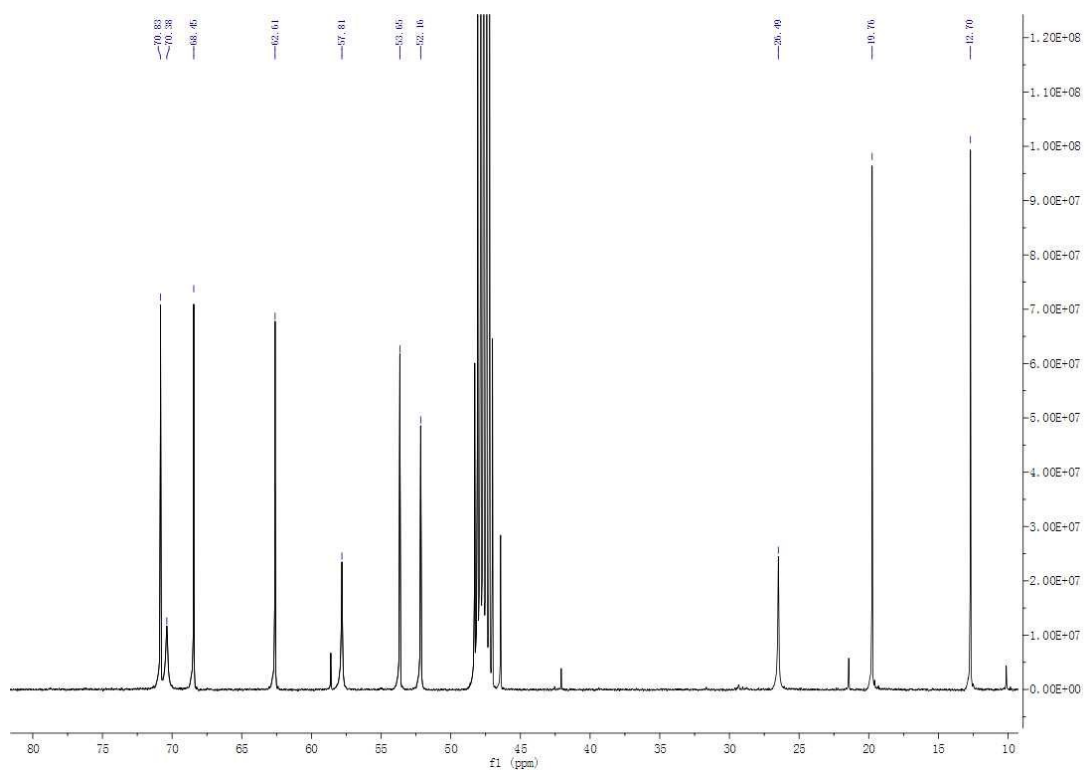

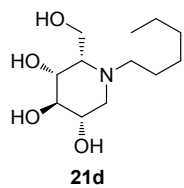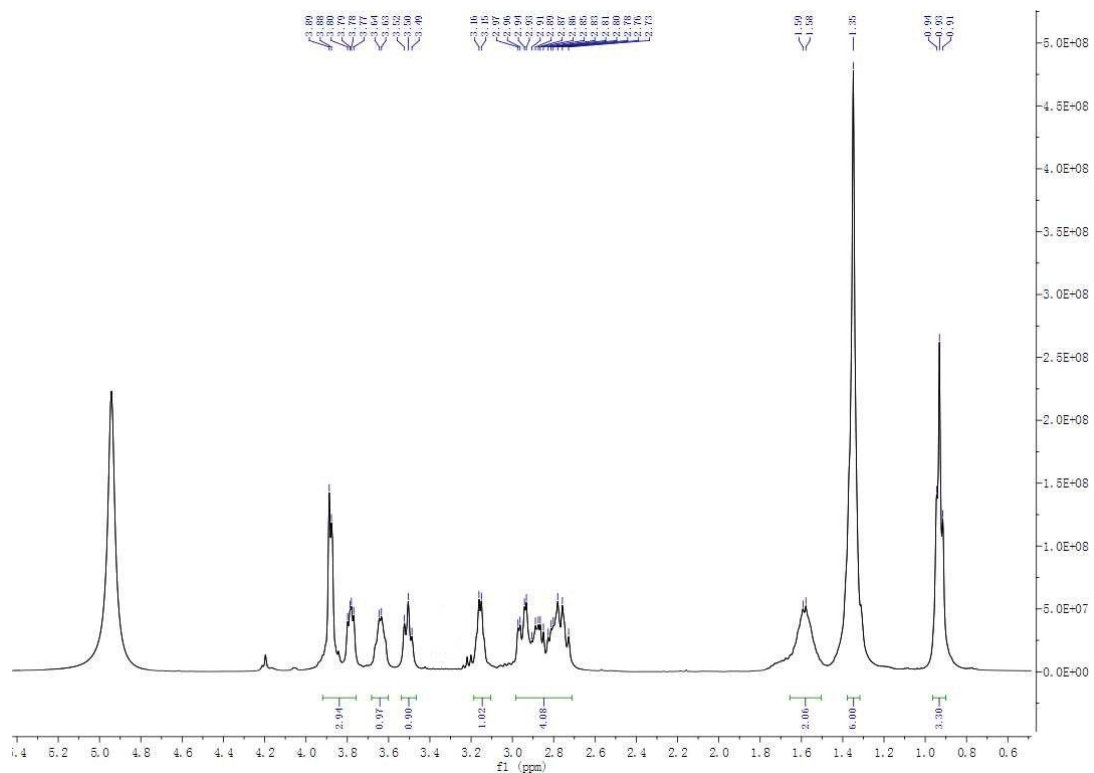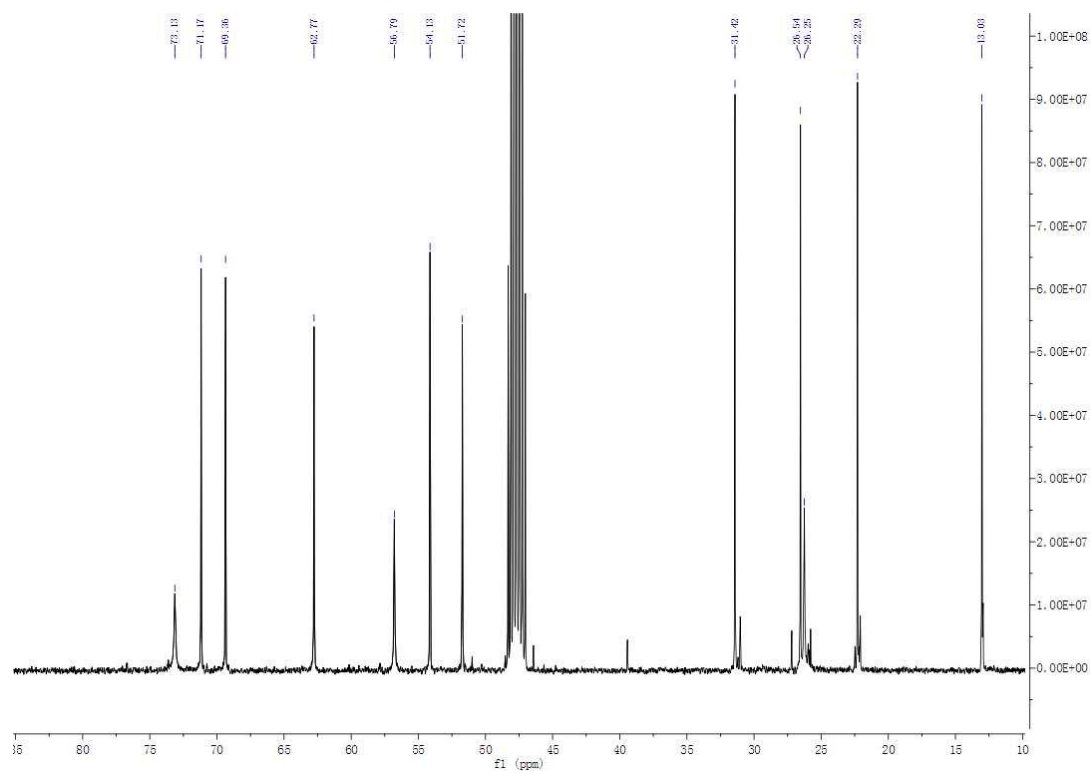

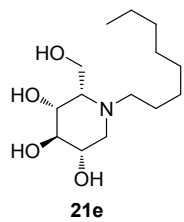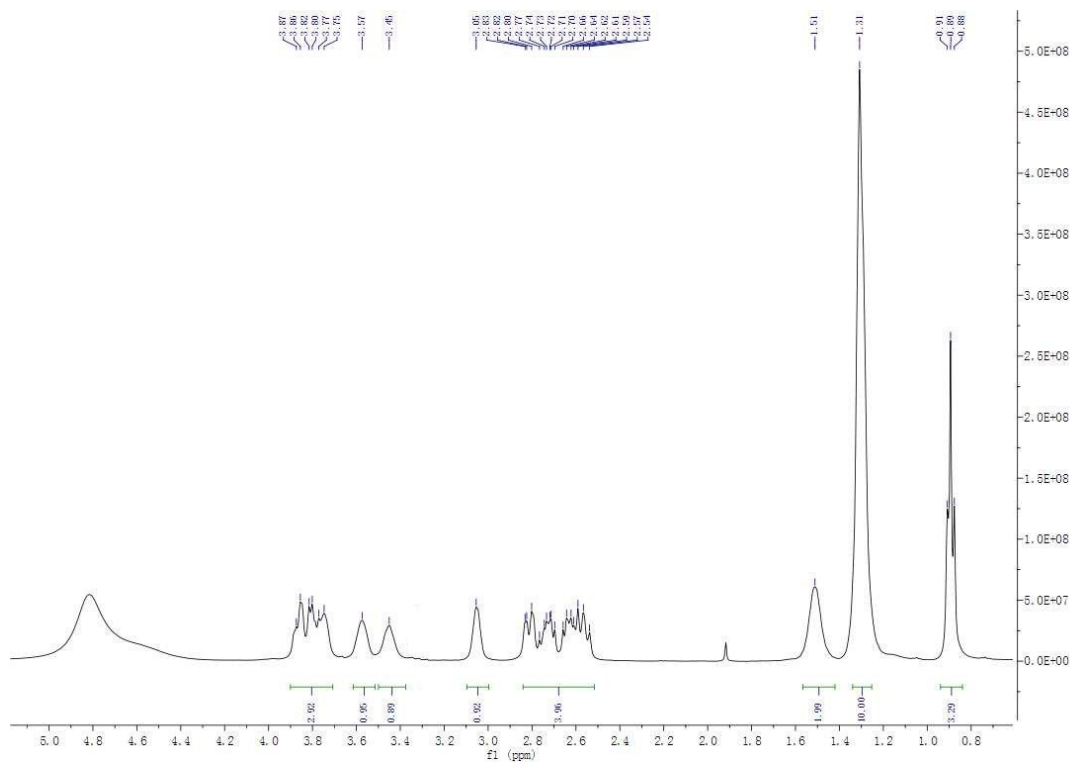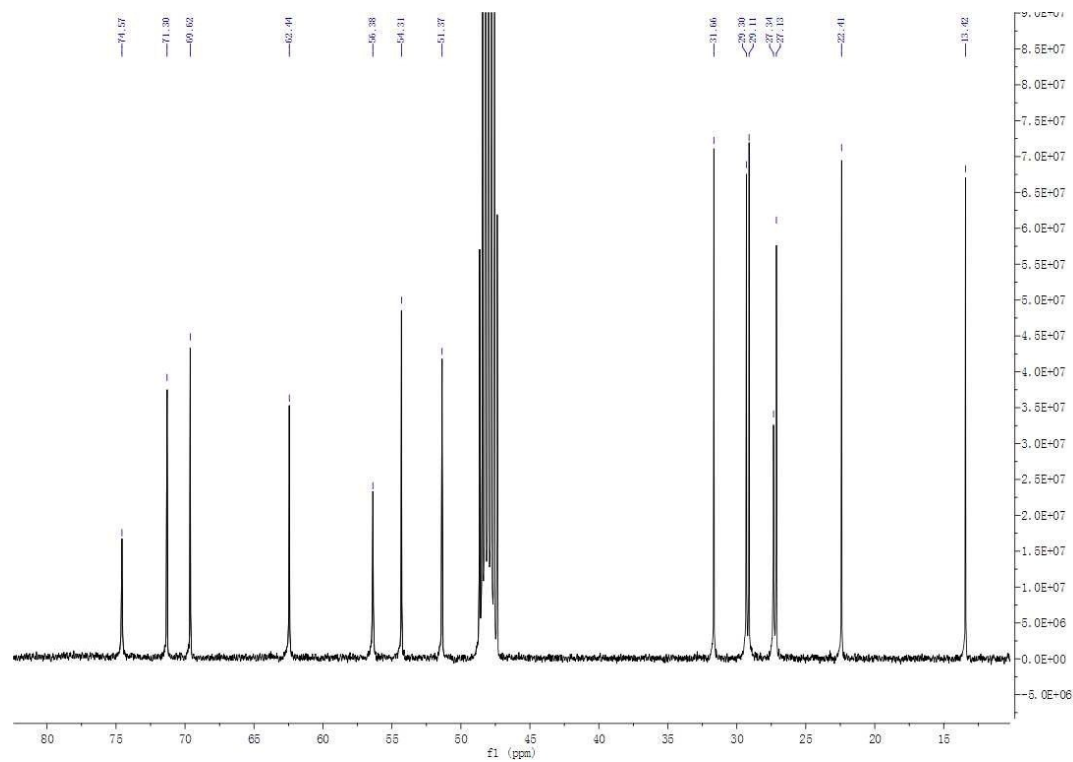

Supplement: c6ob01864e1.pdf [file c6ob01864e1.pdf]
